1 **TITLE:** The *Acinetobacter baumannii* Mla system and glycerophospholipid transport to the  
2 outer membrane

3

4 **AUTHORS:** Cassandra Kamischke<sup>1</sup>, Junping Fan<sup>1</sup>, Julien Bergeron<sup>4</sup>, Hemantha D. Kulasekara<sup>1</sup>,  
5 Zachary D. Dalebroux<sup>1</sup>, Anika Burrell<sup>4</sup>, Justin M. Kollman<sup>4</sup> and Samuel I. Miller<sup>1,2,3\*</sup>

6

7 **AFFILIATIONS:**

8 <sup>1</sup>Departments of Microbiology, <sup>2</sup>Genome Sciences, <sup>3</sup>Medicine, and <sup>4</sup>Biochemistry, University of  
9 Washington, Seattle, WA.

10

11 \*Correspondence to: millersi@uw.edu

12

13 **ABSTRACT**

14 The outer membrane (OM) of Gram-negative bacteria serves as a selective permeability  
15 barrier that allows entry of essential nutrients while excluding toxic compounds, including  
16 antibiotics. The OM is asymmetric and contains an outer leaflet of lipopolysaccharides (LPS) or  
17 lipooligosaccharides (LOS) and an inner leaflet of glycerophospholipids (GPL). We screened  
18 *Acinetobacter baumannii* transposon mutants and identified a number of mutants with OM  
19 defects, including an ABC transporter system homologous to the Mla system in *E. coli*. We  
20 further show that this opportunistic, antibiotic-resistant pathogen uses this multicomponent  
21 protein complex and ATP hydrolysis at the inner membrane to promote GPL export to the OM.  
22 The broad conservation of the Mla system in Gram-negative bacteria suggests the system may  
23 play a conserved role in OM biogenesis. The importance of the Mla system to *Acinetobacter*  
24 *baumannii* OM integrity and antibiotic sensitivity suggests that its components may serve as new  
25 antimicrobial therapeutic targets.

26

27 **INTRODUCTION**

28 Gram-negative bacteria are enveloped by two lipid bilayers, separated by an aqueous  
29 periplasmic space containing a peptidoglycan cell wall. The inner membrane (IM) is a symmetric  
30 bilayer of glycerophospholipids (GPL), of which zwitterionic phosphatidylethanolamine (PE),  
31 acidic phosphatidylglycerol (PG), and cardiolipin (CL) are among the most widely distributed in

32 bacteria (1). In contrast, the outer membrane (OM) is largely asymmetric and composed of an  
33 inner leaflet of GPL and an outer leaflet of lipopolysaccharide (LPS) or lipooligosaccharide  
34 (LOS) (2). The OM forms the first line of defense against antimicrobials by functioning as a  
35 molecular permeability barrier. The asymmetric nature of its lipid bilayer and the structure of  
36 LPS/LOS molecules facilitates barrier function, as the core region of LPS impedes the entry of  
37 hydrophobic molecules into the cell while the acyl chains within the bilayer also help to prevent  
38 the entry of many hydrophilic compounds (3). Although progress has been made in  
39 understanding many aspects of OM assembly – including the discovery of an LPS transport  
40 system and the machinery for proper folding and insertion of outer membrane proteins (4, 5) –  
41 little is known about the molecular mechanisms for transport of the GPLs necessary for OM  
42 formation and barrier function.

43 *Acinetobacter baumannii* is an important cause of antibiotic-resistant opportunistic  
44 infections and has significant innate resistance to disinfectants and antibiotics. Similar to other  
45 Gram-negative opportunistic pathogens such as *Pseudomonas aeruginosa* and *Klebsiella* spp.,  
46 individuals with breached skin or damaged respiratory tract mucosa are most vulnerable (6, 7).  
47 We performed a genetic screen to identify genes important for the OM barrier of *A. baumannii*.  
48 This led to the identification of an ABC (ATP-binding cassette) transporter complex that  
49 promotes GPL export to the OM. Transporter disruption attenuates bacterial OM barrier  
50 function, resulting in increased susceptibility of *A. baumannii* to a wide variety of antibiotics.

51 The homologous system for *E. coli* has previously been termed Mla for its suggested role  
52 in the maintenance of outer membrane lipid asymmetry via the removal of GPL from the outer  
53 leaflet of the OM to the IM. While this is a reasonable hypothesis, there is not direct biochemical  
54 evidence that the Mla system functions to return GPL from the OM to the IM. In this work, we  
55 present evidence that the *A. baumannii* Mla system functions to promote GPL movement from  
56 the IM to the OM. This conclusion is based on the observation that newly synthesized GPLs  
57 accumulate at the IM of *m*la mutants, akin to how LPS molecules accumulate at the inner  
58 membrane in bacteria with mutations in the *l*pt genes encoding the LPS ABC transport system  
59 (5). Given the broad conservation of Mla in prokaryotic diderm organisms, the anterograde  
60 trafficking function of Mla might be exploited by a variety of species.

61

62 **RESULTS**

63 **A screen for activity of a periplasmic phosphatase identifies genes required for *A.***  
64 ***baumannii* OM barrier function.**

65 We identified strains with mutations in genes required for maintenance of the  
66 *Acinetobacter baumannii* OM barrier by screening transposon mutants for the development of a  
67 blue colony phenotype on agar plates containing the chromogenic substrate BCIP-Toluidine  
68 (XP). Although *A. baumannii* carries an endogenous periplasmic phosphatase enzyme, colonies  
69 remain white on agar plates containing XP. We reasoned that lesions in genes necessary for the  
70 OM barrier function should result in a blue colony phenotype, as the XP substrate becomes  
71 accessible to the periplasmic enzyme (8, 9). Screening roughly 80,000 transposon-containing  
72 colonies for the blue colony phenotype yielded 364 blue colonies whose insertions were mapped  
73 to 58 unique genes (Table S1). We confirmed the results of the screen by assaying for OM-  
74 barrier defects using ethidium bromide (EtBr) and N-Phenyl-1-naphthylamine (NPN) uptake  
75 assays (10, 11). We also tested for resistance to antimicrobials, including trimethoprim,  
76 rifampicin, imipenem, carbenicillin, amikacin, gentamicin, tetracycline, polymyxin B, and  
77 erythromycin. Greater than 85% of the strains identified in the screen demonstrated decreased  
78 OM barrier function compared to wild type. Out of the 58 strains with transposon insertions, 23  
79 demonstrated OM permeability defects by NPN and EtBr uptake assays, and 49 out of 58  
80 resulted in increased sensitivity to two or more antibiotics compared to the parent strain,  
81 indicating that the screen identified lesions causing OM barrier defects leading to increased  
82 permeability to small charged and hydrophobic molecules, including commonly used antibiotics.

83

84 **The *Mla* system is necessary for *A. baumannii* OM integrity**

85 Four mutants with a blue colony phenotype contained unique transposon insertions in the  
86 genetic loci A1S\_3103 and A1S\_3102, predicted to encode core components (*m1aF* and *m1aE*) of  
87 a multicomponent ABC transport system. These genes are within a five-gene operon that  
88 encodes for a conserved proteobacterial ABC transport system homologous to the *E. coli m1a*  
89 system previously implicated in OM integrity (12). The *A. baumannii* operon includes: *m1aF* and  
90 *m1aE*, respectively predicted to encode the nucleotide-binding and transmembrane domains of an  
91 ABC transporter; *m1aD*, encoding a protein containing an IM-spanning domain and a predicted  
92 periplasmic soluble domain; *m1aC*, encoding a soluble periplasmic protein; and *m1aB*, an  
93 additional gene predicted to encode a cytoplasmic sulfate transporter and anti-sigma factor

94 antiagonist (STAS)-domain protein (Fig. 1A). An additional putative OM lipoprotein, is encoded  
95 on *mlaA*, or *vacJ*, which is clustered with the rest of the *mla* operon in some Gram-negative  
96 bacteria, although it is at a different chromosomal location in *A. baumannii*. MlaA has been  
97 functionally associated with the rest of the Mla components in *E. coli*, as mutations in *mlaA* yield  
98 comparable phenotypes to mutations in other components of the system (8).

99 Bioinformatic analysis predicts that the *mlaC* and *mlaF* genes respectively encode the  
100 soluble periplasmic component and cytoplasmic ATPase component of the ABC transport  
101 system, and we chose to focus on mutants of these genes for further experiments to elucidate the  
102 function of the *mlaFEDCB* operon. Chromosomal deletions were created by allelic exchange,  
103 and these mutations resulted in OM permeability defects as measured by EtBr uptake assays. We  
104 complemented the OM defect for the  $\Delta mlaC$  and  $\Delta mlaF$  deletion mutants by repairing the  
105 original deletion event in the chromosome, and confirmed complementation of the observed  
106 permeability defect (Fig. 1B). Deletions in *mlaF* and *mlaC* also rendered *A. baumannii*  
107 increasingly sensitive to a variety of antibiotics as determined by MIC measurements (Fig. 1D).  
108 Increased sensitivity to antibiotics whose uptake is not mediated by OM porins is consistent with  
109 a direct effect on the membrane component of the OM permeability barrier (13, 14). In addition  
110 to OM defects, the *mla* mutants display phenotypes that may correlate with OM stress, including  
111 increased production of extracellular carbohydrates as evidenced by crystal violet staining of  
112 pellicles following growth in broth culture (Fig. S1A). These data indicate a role for Mla in the  
113 maintenance of the outer membrane barrier of *A. baumannii*.

114

#### 115 **ATPase activity of MlaF is required for maintenance of the OM barrier of *A. baumannii***

116 To exclude the possibility that the membrane defect was the result of the disruptive effect  
117 of a partially formed Mla protein complex, we engineered an enzymatically inactive ATPase  
118 component and expressed the defective enzyme from a plasmid. We reasoned that by expressing  
119 this allele in the wild type bacteria we could create a dominant-negative effect on Mla function.  
120 The cytoplasmic ATPase component of the Mla system, MlaF, contains the consensus sequence  
121 GxxxxGKT at residues 49-56, characteristic of a Walker A motif. Downstream residues 173-178  
122 contain the sequence LIMYDE, typical of a Walker B motif. The Walker motifs form highly  
123 conserved structures critical for nucleotide binding and hydrolysis (15). The lysine residue of the  
124 Walker A motif is particularly essential for the hydrolysis of ATP. Mutations in this lysine

125 residue are inhibited for nucleotide binding, and the mutated protein is rendered inactive (16).  
126 Additionally, ATPase mutants in the key lysine residue have been shown to have a dominant-  
127 negative effect on ATP hydrolysis when co-expressed with their wild-type ATPase counterparts,  
128 as typical ABC transporters have a structural requirement for two functional nucleotide-binding  
129 proteins which dimerize upon substrate transport (17, 18).

130 Therefore, we created a version of the MlaF coding sequence with a leucine substitution  
131 of the Walker A lysine residue (MlaF<sup>K55L</sup>), and then cloned the mutated *mfaF* into the low-copy  
132 pMMBkan vector under control of the *mfaF* native promoter. We observed that expression of  
133 MlaF<sup>K55L</sup> in wild type *A. baumannii* had a dominant-negative effect on membrane permeability  
134 as measured by EtBr uptake (Fig. 1C), and expression of MlaF<sup>K55L</sup> also resulted in increased  
135 exopolysaccharide production as demonstrated by increased staining by crystal violet (Fig S1B).  
136 Correspondingly, expression of MlaF<sup>K55L</sup> rendered *A. baumannii* more sensitive to a variety of  
137 antibiotics, resulting in reduced MICs when compared to *A. baumannii* expressing the empty  
138 pMMBkan vector (Fig. 1D). Therefore, expression of a defective ATPase results in a dominant-  
139 negative mutant with a comparable phenotype to deletion of components of the *mfa* operon.  
140 These results demonstrate a requirement for ATP hydrolysis by MlaF for the maintenance of OM  
141 barrier function in *A. baumannii*, and indicate that the phenotypes of deletion mutants were likely  
142 a result of a lack of transport function, rather than formation of a toxic incomplete membrane  
143 protein complex.

144

### 145 **Structure of the *A. baumannii* MlaBDEF complex**

146 The genetic arrangement and conservation of the components of this ATPase-containing  
147 transport complex indicated it was likely that the individual components formed a higher order  
148 protein structure. To define whether the Mla components form a stable protein complex, we  
149 expressed the entire operon (*mfaFEDCB*) from *A. baumannii* ATCC 17978 in *E. coli* with a  
150 carboxy-terminal hexahistidine tag on the MlaB component. Affinity purification of MlaB  
151 revealed three additional bands, with sizes corresponding to MlaF, MlaD, and MlaE (Fig. S2)  
152 and confirmed by MALDI-TOF mass spectrometry analysis, indicating that these four proteins  
153 form a stable complex. We did not detect MlaC, suggesting it might interact only transiently with  
154 the other components, consistent with results recently reported by Thong et al. (19).

155 We next used cryo-electron microscopy to characterize the architecture of the *A.*  
156 *baumannii* MlaBDEF complex (abMlaBDEF). This complex is uniformly dispersed in vitreous  
157 ice (Fig. S3A), and 2D classification demonstrated the presence of a range of views suitable for  
158 structure determination (Fig. S3B). Following 2D- and 3D-classification, we obtained a final  
159 dataset of ~ 14,000 particles with which we obtained a structure to a resolution of 8.7 Å (Fig.  
160 S3D). The structure possesses significant visible features in agreement with the nominal  
161 resolution (Fig. S3C). Based on the bioinformatically-predicted localization of individual  
162 proteins and work recently performed on the similar *E. coli* Mla complex (ecMlaBDEF) (19), we  
163 propose that MlaD localizes to the periplasmic side of the IM, MlaE forms the central  
164 transmembrane region, and MlaF and MlaB form the bottom layer on the cytoplasmic face of the  
165 IM with two visible hetero-dimers (Fig. S3E). We note that the structure of ecMlaBDEF, at  
166 lower resolution, was reported recently (20). The overall features of both structures, solved  
167 independently, are identical, suggesting that they correspond to the correct structure for the  
168 complex. However, the limited resolution of the ecMlaBDEF complex structure did not allow  
169 modeling of its individual subunits, in contrast to the abMlaBDEF structure reported here.

170 We note that a clear six-fold symmetry is present for the region of the map attributed to  
171 MlaD (Fig. 2B), despite the fact that we only imposed a 2-fold symmetry averaging. This agrees  
172 with the proposed hexameric state of its *E. coli* homologue (ecMlaD) (19). We next modeled  
173 abMlaD, using an evolution restraints-derived structural model of ecMlaD (21) as a template,  
174 and used our previously-published EM-guided symmetry modeling procedure (22) to model its  
175 hexameric state. The obtained abMlaD hexameric model is at a low-energy minimum (Fig. S4B)  
176 and fits the EM map density well (Fig 2B and S5B Fig). A crystal structure of the periplasmic  
177 domain of ecMlaD published recently (20) formed a crystallographic hexamer, suggesting that  
178 this corresponds to the native hexomeric arrangement for this domain. Our abMlaD hexameric  
179 model is very similar to the crystallographic ecMlaD structure (Fig. S4C), supporting the  
180 proposed domain arrangement in the MlaBDEF complex. We note, however, that one region of  
181 density in the EM map is not accounted for by our MlaD hexamer model (Fig. 2B). The  
182 localization of this extra density suggests that it corresponds to a ~ 45 amino-acid insert present  
183 between strands 4 and 5 of the abMlaD  $\beta$ -sheet (Fig. S5A). The role of this insert, uniquely  
184 found in the *A. baumannii* orthologue, is not known.



185           We next modeled the structures of MlaB and MlaF and fitted their respective coordinates  
186 in the corresponding region of the EM map (Fig. 2C and Fig. S4A). For both proteins, most  
187 helices are well resolved, which allowed us to place the models unambiguously. We then  
188 compared the conformation of the ATPase MlaF to that of the maltose transporter ATPase MalK,  
189 which has been trapped in several conformations of the transporter; i.e. the inward-facing state,  
190 the pre-translocation state, and the outward-facing state (23, 24). Interestingly, the arrangement  
191 of MlaF clearly resembles the pre-translocation state of MalK (Fig. 2D). This suggests that we  
192 have trapped a similar conformation of the abMlaBDEF complex. It is possible that MlaD and/or  
193 MlaF, for which there are no equivalent in other ABC transporters, stabilizes this conformation.  
194 Alternatively, it is possible that the presence of detergents, which were present to solubilize the  
195 complex, mimics the natural ligand in the transporter's active site. Finally, the transmembrane  
196 (TM) region of the map is well resolved, and density for the transmembrane (TM) helices can be  
197 clearly identified. We therefore modeled abMlaE, using an evolution restraints-derived structural  
198 model of ecMlaE (21) as a template, and fitted the obtained coordinates in the corresponding  
199 region of the map, with the orientation corresponding to the predicted topology. The resulting  
200 MlaE dimer model (Fig. 2D) fits well to the EM map density (Fig. S5C), and clearly corresponds  
201 to a closed transporter, with no solvent channel between the subunits. Interestingly, we also  
202 noted clear density for three TM helices that likely correspond to the MlaD N-terminal helices  
203 (Fig. 3A). However, they lacked continuity, and we observed that only two form a direct  
204 interaction with MlaE. It is possible that this is due to heterogeneity in the orientation of MlaD  
205 relative to the rest of the complex. To verify this, we performed further 2D classification of the  
206 particles used for reconstruction (Fig. 3B), which revealed a range of positions for the MlaD  
207 region relative to the rest of the complex. We therefore performed further 3D classification  
208 leading to a smaller dataset of ~ 8,000 particles. This produced a structure of lower resolution (~  
209 11.5 Å) but with the six MlaD N-terminal TM helices clearly visible (Fig. 3B). While the  
210 periplasmic domain possesses 6-fold symmetry, the TM domains of MlaD do not appear  
211 symmetrical, with two forming close contacts with the density attributed to MlaE while the other  
212 four do not appear to contact any other proteins. This observation likely explains the asymmetry  
213 of contacts between the dimeric MlaE and the hexameric MlaD. A higher-resolution structure  
214 will be required to determine if additional contacts are formed between the outward-facing loops  
215 of MlaE and the periplasmic domain of MlaD.

216

## 217 **Components of the Mla system interact directly with GPL**

218         The crystal structure of MlaC has been solved from *Ralstonia solanacearum*. The  
219 structure contains a single phosphatidylethanolamine molecule oriented such that the  
220 hydrophobic acyl chains are located inside the protein while the hydrophilic head group is  
221 exposed (25). More recently, the crystal structure for MlaC has been solved from *E. coli* and  
222 shown to bind lipid tails (20). As noted in previous work performed on the *E. coli* Mla system,  
223 this is strong evidence that the substrates of the Mla system are GPL (12). In order to confirm  
224 that the periplasmic components of the Mla pathway in *A.baumannii* interact with GPL, we  
225 purified the soluble domains of both MlaC and MlaD by expressing histidine-tagged proteins  
226 followed by Ni-affinity FPLC purification. After overnight dialysis of the proteins, we performed  
227 Bligh-dyer chloroform extraction on the purified proteins to isolate any bound GPL and analyzed  
228 the results by LC-MS/MS. GPL analysis revealed both phosphatidylglycerol and  
229 phosphatidylethanolamine of varying acyl chain lengths. This suggests the possibility that the  
230 periplasmic substrate binding components of the system may bind diacylated GPL molecules  
231 with limited polar head group specificity (Fig. S6).

## 232 **Mla mutants have decreased abundance of outer membrane GPL**

233         Given the OM defect of *mfa* mutants, as well as the system's apparent direct association  
234 with GPL, we chose to further characterize the overall membrane GPL composition of the *mfa*  
235 mutants. Previous work on the Mla system in *E.coli* has demonstrated an increase in hepta-  
236 acylated lipid A in *mfa* mutants, indicating activation of PagP that acylates GPL and lipid A in  
237 the outer leaflet of the OM in enterobacteria (12, 26). From this data it has been suggested that  
238 the system may serve to maintain lipid asymmetry within the OM, although it is well known that  
239 GPL displacement to the OM outer leaflet is a general reflection of chemical damage to the OM  
240 (27-29). However, biochemical analysis of the membrane GPL composition for *mfa* mutants has  
241 not been published for any organism to our knowledge, so we sought to apply our lab's methods  
242 of GPL quantification to test the hypothesis of retrograde transport function. To determine  
243 whether *A. baumannii mfa* mutations cause changes in the membrane GPL concentration, GPL  
244 were extracted from inner and outer membrane fractions separated by density centrifugation.  
245 Thin-layer chromatography (TLC) and electrospray-ionization time-of-flight mass spectrometry  
246 (ESI-MS) were used to qualitatively assess GPL composition. TLC and ESI-MS indicated



247 *ΔmlaC A. baumannii* had a dramatically decreased abundance of all major phospholipid species  
248 in the OM compared to wild type. (Fig. 4A and Fig. S7).

249 To better analyze the differences in membrane GPL, we quantified GPL by normal phase  
250 liquid-chromatography collision-induced-dissociation mass spectrometry (LC-MS/MS). We  
251 quantified the ratio of individual GPL within each membrane by normalizing to an internal  
252 standard of known quantity. We then normalized the quantified GPL to the protein content of  
253 isolated IM and OM. Quantitative LC-MS/MS confirmed the overall reduction in outer  
254 membrane GPLs observed by ESI-MS and TLC, with the reduced levels observable across  
255 multiple GPL species for *ΔmlaC* mutants relative to wild type (Fig. 4B). Therefore, mutations in  
256 the components of the Mla system result in a decrease in OM GPL, whereas the retrograde  
257 transport hypothesis would predict an increase in OM GPL. Therefore, these results instead  
258 suggest a possible role for Mla in outward GPL trafficking.

259

#### 260 **Mla mutants demonstrate an accumulation of newly synthesized GPL in the IM**

261 The overall decrease in outer membrane glycerophospholipids of *A. baumannii mla*  
262 mutants suggests that either the Mla system is functioning to deliver GPLs from the inner  
263 membrane to the outer membrane, or alternatively, mutations in the Mla system may disrupt the  
264 outer membrane in a manner that leads to the activation of outer membrane phospholipases,  
265 which then degrade GPL. Work performed on the Mla system in *E.coli* has demonstrated that  
266 disruption of genes in the Mla pathway results in activation of both the OM acyl-transferase  
267 PagP, which cleaves a palmitate moiety from GPL and transfers it to LPS and PG, creating a  
268 hepta-acylated LPS molecule and palmitoyl-PG and the OM phospholipase PldA (12, 28). *A.*  
269 *baumannii* has no known PagP enzyme but similar activity of the multiple predicted OM  
270 phospholipases could account for the reduction in OM GPL as observed by TLC and quantitative  
271 mass spectrometry. Therefore, we designed a mass spectrometry-based assay to study  
272 intermembrane GPL transport using <sup>13</sup>C stable isotope labeling (Fig. S8A), to better analyze the  
273 directionality of GPL transport by the Mla system between the bacterial membranes. When  
274 grown in culture with sodium acetate as the sole carbon source, many bacteria directly synthesize  
275 acetyl-CoA using the conserved enzyme acetyl-CoA synthase (30). Acetyl CoA, the precursor  
276 metabolite for fatty acid biosynthesis, is first converted to malonyl-CoA and enters the FasII  
277 (fatty acid biosynthesis) pathway that supplies endogenously synthesized fatty acids to

278 macromolecules such as lipopolysaccharides, phospholipids, lipoproteins, and lipid-containing  
279 metabolites. By growing cultures in unlabeled acetate then “pulsing” with 2-<sup>13</sup>C acetate and  
280 analyzing separated membrane fractions from set time points, we can observe the flow of newly  
281 synthesized GPLs between the IM and OM of *A. baumannii* (Fig. S8B) (26).

282         Upon introducing the 2-<sup>13</sup>C acetate as the sole carbon source, <sup>13</sup>C-labeled GPL were  
283 immediately synthesized in the bacterial cytoplasm. We reasoned that continued growth in <sup>13</sup>C  
284 acetate should result in a mixed pool of unlabeled and labeled IM GPL molecules. As the GPL  
285 are then fluxed from the IM to the OM, the likelihood that an individual GPL molecule is  
286 transported is directly proportional to the ratio of labeled to unlabeled GPL in the IM pool. As  
287 the bacteria continue to grow in <sup>13</sup>C acetate, the ratio of labeled to unlabeled GPL in the IM will  
288 gradually increase as new GPL are synthesized and inserted in the IM. As such, the likelihood of  
289 transporting labeled GPL to the OM will also increase. A comparison of the ratios of labeled to  
290 unlabeled GPL in the IM and OM will thus reflect the efficiency of transport between the  
291 membranes, and analysis of transport in wild type *A. baumannii* will establish reference for  
292 transport efficiency with which to compare our mutants. Additionally, OM phospholipases, some  
293 of which may be activated upon membrane damage (31), will not distinguish between labeled  
294 and unlabeled GPL and therefore will not affect the ratio of labeled to unlabeled GPL obtained  
295 from this assay.

296         Membrane separation and analysis of wild type *A. baumannii* revealed near-identical  
297 rates-of-change between the two membranes in ratios of <sup>13</sup>C-labeled to unlabeled GPLs,  
298 indicating that newly synthesized GPLs are transported and inserted into the OM at a rate  
299 equivalent to their rate of synthesis and assembly within the IM. Furthermore, the ratios of  
300 labeled to unlabeled GPLs were nearly equal in the IM compared to the OM at the time points  
301 evaluated indicating that GPL transport likely occurs rapidly, consistent with earlier pulse-chase  
302 experiments performed in *E. coli* that estimate the half-life of translocation of various GPLs at  
303 between 0.5 and 2.8 min (32). By contrast, mutants in the Mla system accumulate newly  
304 synthesized GPLs in their IM at a greater rate than occurs in the OM as evidenced by the  
305 increasing disparity in the ratio of labeled to unlabeled GPLs between the IM and OM over time  
306 (Fig 5A). The discrepancy in ratios of labeled to unlabeled GPLs between the IM and OM of  
307  $\Delta mlaF$  is apparent for PG and PE of varying acyl chain lengths corresponding to the most  
308 naturally abundant species C16:0/C16:0, C18:1/C18:1, or C16:0/C18:1 (Table S2). Further, the

309 effects of MlaF<sup>K55L</sup> expression on GPL trafficking were similar to what was observed in the  
310  $\Delta mlaF$  strain (Fig. 5B). Therefore, ATP hydrolysis by MlaF appears to be a requirement for  
311 extraction of these GPLs from the IM of *A. baumannii* for subsequent transport to the OM.

312 To better characterize the role of the periplasmic substrate binding component MlaC, we  
313 performed similar stable isotope pulse experiments to observe the flow of newly synthesized  
314 GPLs in the  $\Delta mlaC$  strains. Stable isotope experiments on  $\Delta mlaC$  mutants reveal IM  
315 accumulation of newly synthesized GPLs similar to the result in  $\Delta mlaF$  mutants (Fig. S9A),  
316 indicating that in the absence of the periplasmic component GPLs are not efficiently removed  
317 from the IM by the remainder of the Mla system. We also sought to characterize the potential  
318 role of the putative OM-lipoprotein MlaA, which has been implicated as a component of the Mla  
319 system in *E. coli*. A chromosomal deletion strain of *mlaA* was created by allelic exchange, and  
320 complemented by expression of MlaA from a pMMB67EH-Kan plasmid. The results of the  
321 stable isotope pulse experiments in the  $\Delta mlaA$  strain revealed results consistent with those  
322 obtained from  $\Delta mlaC$  and  $\Delta mlaF$ , in which the ratio of labeled to unlabeled GPL is consistently  
323 higher in the inner membrane than the outer membrane after one hour of exposure to <sup>13</sup>C-acetate  
324 (Figure S9B and S9C). These results are consistent with a model in which the IM-localized ABC  
325 transporter complex MlaBDEF first transfers GPLs to the periplasmic binding protein MlaC,  
326 which then transports GPL to the OM, whereupon MlaA facilitates GPL insertion into the OM.

327

## 328 **DISCUSSION**

329 We performed a screen to identify *A. baumannii* proteins that are essential for its OM  
330 barrier that led to the identification of an ABC transport system whose ATPase activity maintains  
331 OM barrier function. IM and periplasmic components of this system can be purified, bind GPLs,  
332 and assemble into a defined protein complex with significant symmetry, indicating that this  
333 system could function to transport GPLs from the IM to the OM. Consistent with the possibility  
334 that Mla functions as an anterograde transporter, the OM of mutants show an overall reduction of  
335 GPL along with an excess accumulation of newly synthesized GPL on the IM. Therefore, these  
336 results lead us to propose that the function of the *A. baumannii* Mla system is the trafficking of  
337 GPL from the IM, across the periplasm, for delivery to the outer membrane (Fig. 6). According  
338 to this model, ATP hydrolysis by MlaF provides the initial energy to extract GPL from the IM,  
339 while the substrate binding components MlaD and MlaC take up lipids for delivery to the OM. It

340 has been observed by van Meer and colleagues that complete extraction of GPLs from the  
341 membrane bilayer requires a Gibbs free energy of  $\sim 100$  kJ/mol (33, 34), whereas ATP contains  
342 just 30 kJ/mol of energy. To account for the energy difference, a hydrophobic acceptor molecule  
343 is proposed to allow the lipids to fully dissociate from the rest of the ABC transporter and  
344 facilitate complete removal from the bilayer. The GPL-binding component, MlaD, contains an  
345 IM spanning domain and is shown here, and in orthologous systems, to be in complex with the  
346 MlaE and MlaF proteins within the IM (20, 35). The close association of MlaD with the outer  
347 leaflet of the IM may allow it to extract lipids from the IM by hydrophobic interaction with the  
348 acyl chains after ATP hydrolysis by MlaF. Subsequent trafficking across the periplasm then  
349 involves the periplasmic GPL binding protein MlaC, which likely accepts GPL from MlaD and  
350 then carries them to the OM. We note however the observed effect of *mlaC* deletion on GPL  
351 accumulation in the IM, while statistically significant for most of the analyzed diacyl-  
352 glycerophospholipids, appears to be less than that of deletion of the ATPase component (Fig.  
353 5C), suggesting that while MlaC may participate in transfer to the OM, there may be redundant  
354 mechanisms by which the IM complex can transport or remove IM GPL in the absence of MlaC.  
355 While the precise mechanism of GPL insertion into the OM is not yet known, work performed  
356 on the *E.coli* Mla system has shown that MlaC interacts with both the IM MlaFEDB complex, as  
357 well as with the putative OM lipoprotein MlaA, and our results support a role for MlaA in the  
358 function of the overall Mla system and delivery of GPL to the OM.

359 In this work, we designed a method to monitor lipid transport between Gram-negative  
360 bacterial membranes using stable  $^{13}\text{C}$  isotope labeling. Our results using this assay are consistent  
361 with the Mla system functioning as an anterograde GPL transporter, however they do not  
362 exclude the possibility of a dual role for Mla components in the maintenance of OM lipid  
363 asymmetry. Previous work performed on the orthologous Mla system in *E.coli* has been  
364 interpreted to suggest that the function of the system is to remove GPL from the outer leaflet of  
365 the OM for retrograde transport back into the cytoplasm based on the observation that *E.coli mla*  
366 mutants likely contain GPLs on the outer leaflet of the OM. (12, 36). This proposed function was  
367 inferred from the observation that gene deletions resulted in an increased activation of the OM-  
368 phospholipase enzymes PagP and OMPLA, suggesting an increased amount of GPL in the outer  
369 leaflet of the OM (12). The interpretation of retrograde transport function was also based on the  
370 existence of an orthologous system in plant chloroplasts that transports lipids from the

371 endoplasmic reticulum (ER) into the organelle. Many plants require this retrograde transport  
372 function because certain lipids in the chloroplast thylakoid membrane derive from GPL  
373 originating in the ER (37). However, since Gram-negative bacteria synthesize GPL within the  
374 IM, retrograde transport of GPL would only be necessary for the recycling of GPL mislocalized  
375 to the OM outer leaflet. Although this is a reasonable inference based on data available at the  
376 time, we would point out that the directionality of transport by the *E. coli* Mla system had not  
377 been thoroughly probed experimentally using membrane analysis or with a functional assay of  
378 the type performed here. It is conceivable that the import function of the orthologous chloroplast  
379 TGD system is a result of adaptation to the intracellular environment, the system in this case  
380 having evolved to aid in the transfer of GPL from the nearby ER to the chloroplast. Furthermore,  
381 while it is possible that the Mla system in *E. coli* serves a different primary function than in *A.*  
382 *baumannii*, we demonstrate here that both complexes possess a similar architecture, pointing to a  
383 conserved function. The outer membrane defect phenotypes observed in *E. coli mla* mutants  
384 might also be explained by a disruption of OM structure stemming from decreased  
385 concentrations of OM GPL, leading to activation of the PagP enzyme. It is well established that  
386 for *E. coli*, GPL displacement to the OM outer leaflet and subsequent activation of these  
387 enzymes reflects OM instability and can be achieved by chemical disruption of the bilayer (27-  
388 29). It may be the case that the OM of *E. coli mla* mutants contain GPL in the outer leaflet, but  
389 the possibility remains that OM GPL can flip into the outer leaflet under conditions of OM  
390 damage resulting from an imbalance of LPS-to-GPL ratios, along with perhaps the  
391 corresponding disruption of OM proteins. However, final determination of the directionality of  
392 GPL transport by the Mla system in *E. coli* and other organisms will require intermembrane  
393 transport studies similar to what has been done here for *A. baumannii*, along with studies similar  
394 to those performed for the Lpt LPS transport system for which molecular transfer of LPS from  
395 molecule to molecule of the Lpt system is functionally defined.

396         The gene for MlaA, the proposed OM component, is at a different chromosomal location  
397 from the remainder of the *mla* operon. Recent structural studies on MlaA have revealed that  
398 MlaA forms a ring-shaped structure localized the inner leaflet of the OM, and have shown it to  
399 form stable complexes with the outer membrane proteins OmpF and OmpC (38). The proposed  
400 structure of MlaA in the OM supports the argument that MlaA is involved in removal of GPL  
401 from the outer leaflet, and it is suggested that GPL from the outer leaflet travel through a pore in

402 MlaA where they are received by MlaC, yet our data reveals that *A. baumannii*  $\Delta mlaA$  mutants  
403 are defective in delivery of GPL from the IM to the OM. These data can be reconciled by a  
404 model in which MlaA functions both to remove mislocalized GPL from the outer leaflet of the  
405 OM, and additionally serves to facilitate delivery of GPL to the OM by MlaC, perhaps by  
406 enabling MlaC localization to the surface of the inner leaflet. By this model, mutations in MlaA  
407 will be phenotypically similar to mutations in other components of the Mla system, and we  
408 would expect to observe a decreased rate of anterograde GPL transport. We would here point out  
409 that while previous work has implicated the Mla system in the maintenance of OM lipid  
410 asymmetry through observation of increased activity of PagP, the role of the MlaFEDB complex  
411 and MlaC in retrograde GPL transport has previously only been inferred from homology to the  
412 chloroplast TGD system. It is established that cellular mechanisms exist in Gram-negative  
413 bacteria to resist stressful conditions that lead to OM disruption. For example, OM  
414 phospholipase enzymes, such as PldA, are activated under conditions of membrane stress to  
415 digest GPL in the outer leaflet of the OM, as high levels of GPL in the outer leaflet destabilize  
416 the OM barrier function. The model of retrograde GPL transport by the Mla system proposes that  
417 growing cells expend cellular energy in the form of ATP in order to transport undigested GPL  
418 from the OM, across the periplasm, and back into the IM, at which point some of those same  
419 molecules will be transported back to the OM by an unknown mechanism. However, the  
420 available data points most clearly to a model of anterograde GPL transport by MlaFEDB and  
421 MlaC, facilitated in some way by MlaA.

422         The first three genes of the *mla* operon – comprising an ATPase, permease, and substrate-  
423 binding components of the ABC transporter complex – are conserved in *Mycobacteria spp*,  
424 *Actinobacteria*, and chloroplasts, while the entire five-gene operon appears to be conserved in  
425 Gram-negative bacteria (39). Given the conservation of the system across Gram-negative  
426 species, our results may shed light on a generalized mechanism contributing to OM biogenesis.  
427 Additionally, we have here demonstrated that the function of this ABC transport system is  
428 crucial for maintaining the integrity of the *A. baumannii* OM. The fact that *mla* mutations are  
429 tolerated, and that levels of OM GPL are reduced but not abolished, suggests the intriguing  
430 possibility of additional undiscovered mechanisms of GPL delivery to the OM. Also of interest is  
431 the potential role of the increased exopolysaccharide observed upon disruption of the Mla  
432 system. It is possible this exopolysaccharide plays a partially compensatory role in *A. baumannii*



433 resulting from decreased OM GPL, given that recent work has shown that *A. baumannii*  
434 exopolysaccharides can contribute to antibiotic resistance, likely through improved barrier  
435 function (40).

436 The progression towards a more complete understanding of intermembrane GPL  
437 transport and OM barrier function should ultimately have relevance in the development of novel  
438 drug targets to undermine emerging antibiotic resistance in Gram-negative pathogens. The  
439 emergence of antibiotic resistant Gram-negative bacteria for which few or no antibiotics are  
440 available therapeutically is an important medical concern. This issue is typified by current  
441 isolates of *A. baumannii* that can only be treated with relatively toxic colistin antibiotics. This  
442 has led many individuals and agencies to propose the development of single agent antimicrobials  
443 which could be used for organisms such as *A. baumannii* and *P. aeruginosa* that have significant  
444 antibiotic resistance. Therefore, work furthering the understanding of the OM barrier could lead  
445 to the development of drugs which target the barrier and allow the therapeutic use of many  
446 current antibiotics.

447

## 448 **MATERIALS AND METHODS**

449

### 450 **Bacterial strains:**

451 Transposon mutagenesis and subsequent chromosomal deletions of *mia* genes were performed in  
452 *Acinetobacter baumannii* ATCC 17978.

453

### 454 **A Mariner-based transposon vector for use in *Acinetobacter baumannii*:**

455 To perform transposon mutagenesis a Mariner-based transposon vector was designed for use in  
456 *Acinetobacter baumannii* ATCC 17978. The new transposon vector, derived from pBT20,  
457 termed pMarKT, contains an outward facing pTac promoter as well as a selectable kanamycin  
458 resistance marker followed by an omega terminator within the Mariner arm sites (41). The  
459 plasmid backbone contains the Mariner transposase gene C9 Himar, a *tetRA* resistance marker  
460 from Tn10, a p15A origin from pACYC184, and an oriT site for mobilization. The plasmid was  
461 constructed by PCR of select fragments followed by restriction digest and ligation of the cleaved  
462 ends. The new transposon vector was confirmed by restriction digest and partial sequencing.

463

464 **Transposon mutagenesis:**

465 Initial mutagenesis revealed that many hits occurred in the high affinity phosphate uptake  
466 transcriptional repressor *phoU* (A1S\_0256). Subsequent rounds of mutagenesis were conducted  
467 on an ATCC 17978 *phoU* chromosomal deletion strain, and plated on high phosphate media to  
468 reduce the background level of cleavage of the chromogenic substrate. Chromosomal deletions  
469 were performed by allelic exchange using a pEX2tetRA vector, which was created by insertion  
470 of the *tetRA* tetracycline resistance marker from Tn10 into the pEXG2 plasmid (42). Roughly  
471 1000bp regions upstream and downstream of the genes of interest were amplified for  
472 homologous recombination with the ATCC 17978 chromosome. Sucrose was used to counter-  
473 select against cells retaining the pEX2tetRA backbone, and deletions were confirmed by PCR.  
474 Complementation of deletions was accomplished by repairing the original deletion in the  
475 chromosome, again using the pEX system and allelic exchange.

476 Donor *E. coli* containing the pMarKT transposon vector were suspended in LB broth to  
477 an OD<sub>600</sub> of 40 and mixed with an equal volume of the recipient *A. baumannii* suspended to  
478 OD<sub>600</sub> of 20. 50 µL aliquots of this mixture were then plated in spots on a dried LB agar plate  
479 and incubated for 2 h at 37 °C (41). Each 50 µL spot resulted in about 80,000 colonies of *A.*  
480 *baumannii* containing Mariner transposon insertions. The mutants were plated on LB agar  
481 containing 1X M63 salts, 50 µg/mL kanamycin, 30 µg/mL chloramphenicol, and 40 µg/mL XP  
482 substrate. Plates were incubated for at least 36 h at 30 °C to allow for the appearance of the blue  
483 color from cleavage of the XP substrate. Sequencing of the transposon insertions was adapted  
484 from the method described in Chun et. al. (43), including semi-arbitrary two-step PCR  
485 amplification of transposon regions followed by sequencing.

486

487 **Ethidium bromide uptake assay:**

488 Bacteria were grown in 5 mL LB cultures to mid-log OD<sub>600</sub> (0.3-0.6), then spun down and  
489 normalized in PBS to OD<sub>600</sub> 0.2. Prior to measurement, CCCP was added at 200 µM to inhibit  
490 the activity of efflux pumps. Ethidium bromide was added immediately prior to measurement to  
491 final concentration of 1.2 µM in 200 µL total reaction volume. Permeability was assessed using a  
492 PerkinElmer EnVision 2104 Multilabel Reader using a 531 nm excitation filter, 590 nm emission  
493 filter, and a 560 nm dichroic mirror. Readings were taken every 15 s for 30 min with samples  
494 assessed in triplicate in a Greiner bio-one 96-well flat bottom black plate.

495

496 **MIC measurements:**

497 MICs were determined in 96-well microtiter plates using a standard two-fold broth dilution  
498 method of antibiotics in LB broth. The wells were inoculated with  $10^4$  bacteria per well, to a  
499 final well volume of 100  $\mu$ L, and plates were incubated at 37 °C with shaking unless stated  
500 otherwise. Experiments were performed thrice using two technical replicates per experiment.  
501 MICs were interpreted as the lowest antibiotic concentration for which the average OD<sub>600</sub> across  
502 replicates was less than 50% of the average OD<sub>600</sub> measurement without antibiotic.

503

504 **Crystal violet assay for exopolysaccharide production:**

505 Strains were inoculated to OD<sub>600</sub> 0.05 and grown overnight at 37 °C in 2 mL LB broth with  
506 shaking in glass tubes. The next day, liquid was carefully decanted and the tubes left to dry for 2  
507 h at 37 °C. Pellicles were stained with the addition of 0.1% crystal violet, then gently washed  
508 three times in dH<sub>2</sub>O. Crystal violet was solubilized in a 80:20 solution of ethanol:acetone and  
509 read at 590 nm. P values were determined from a Student's t-test over three biological replicates  
510 per sample.

511

512 **Membrane isolation, GPL extraction, and TLC:**

513 Cells were collected at specified time points and spun down at 17,000 g for 10 min. Spheroplast  
514 formation and sucrose gradient separation of IM and OM was adapted from a method by Osborn  
515 et. al (44) by use of a defined 73%-53%-20% sucrose gradient as described in Dalebroux et. al.  
516 (45). The purity of membrane separation by this method was confirmed by Western blotting for  
517 the *A. baumannii* OM-localized OmpA protein, with 10  $\mu$ g of total protein loaded into each lane  
518 as measured by Bradford protein assay (Fig. S10). GPLs from isolated membranes were  
519 extracted using a 0.8:1:2 ratio of water : chloroform : methanol as per the method of Bligh and  
520 Dyer (46). Two-dimensional TLC was performed using silica gel 60 plates and immersion in  
521 Solvent System A (60:25:4 CHCl<sub>3</sub>:CH<sub>3</sub>OH:H<sub>2</sub>O), followed by Solvent System B (80:12:15:4  
522 CHCl<sub>3</sub>:CH<sub>3</sub>OH:CH<sub>3</sub>COOH:H<sub>2</sub>O) in the orthogonal direction.

523

524 **Cryo-EM sample preparation, data acquisition and image processing:**

525 Purified Mla complex at ~1 mg/ml was applied to glow-discharged holey grids, blotted for 6 s,  
526 and plunged in liquid ethane using a Vitrobot (FEI). Images were acquired on a FEI Tecnai G2  
527 F20 200 kV Cryo-TEM equipped with a Gatan K-2 Summit Direct Electron Detector camera  
528 with a pixel size of 1.26 Å/pixel. 500 micrographs were collected using Legion (47) spanning a  
529 defocus range of -1 to -2 µm.

530

531 Movie frames were aligned with MotionCorr2 (48) and the defocus parameters were estimated  
532 with CTFFIND4 (49). 333 high-quality micrographs were selected by manual inspection, from  
533 which ~55,000 particles were picked with DOG in Appion (50). Particle stacks were generated in  
534 Appion using a box size of 200 pixels. Several successive rounds of 2D and 3D classification  
535 were performed in Relion 2 (51, 52) using an initial model generated by Common Lines in  
536 EMAN2 (53) leading to a final stack of ~ 14,000 particles for 3D structure refinement in Relion.

537

#### 538 **Structure modeling and docking in the EM density:**

539 The structures of MlaB and MlaF were modeled using the threading server Phyre (54) based on  
540 the structures of the anti-sigma factor antagonist tm1081 (PDB ID 3F43, 18% sequence identity  
541 to MlaB) and the ABC ATPase ABC2 (PDB ID 1OXT, 36% sequence identity to MlaF)  
542 respectively. Two copies of each structural model were positioned in their putative location  
543 within the EM map using Chimera (55) and their position was optimized using the Fit to EM  
544 map option. The abMlaD and abMlaE structures were modeled on ecMlaD and ecMlaE  
545 structural models deposited in the Gremelin database (21), using Modeller. For abMlaE, the  
546 hexamer was modelled with Rosetta (56) as described previously (4).

#### 547 **Membrane Isolation and Separation**

548 Cells were resuspended in 20 mL of 0.5 M sucrose, 10 mM Tris pH 7.8, 75 µg freshly prepared  
549 lysozyme (Roche 10837059001), and 20 mL of 0.5 mM EDTA, and kept on ice with gentle  
550 stirring for 20 min. Samples were homogenized (Avestin EmulsiFlex-C3) and spun down at  
551 17,000 g for 10 min to removed un-lysed cells prior to ultracentrifugation. Membranes were spun  
552 down using a Ti45 Beckman rotor at 100,000 g for 1 h and then added to the top of a sucrose  
553 gradient. IM and OM were separated by 18-hour ultracentrifugation using a SW-41 rotor in a  
554 Beckman Coulter Optima L90X ultracentrifuge.

555

556 **MlaC and MlaD protein purification and GPL extraction:**

557 Primers were designed to amplify the *mlaC* gene of ATCC 17978, excluding the signal sequence  
558 for export from the cytoplasm, and the periplasmic domain of *mlaD* of ATCC 17978, excluding  
559 the membrane-spanning domain. These fragments were cloned into pET29b and expressed with  
560 a carboxy-terminal hexahistidine (-6HIS) tag in BL21 *E. coli* with 2 h induction. Cells were  
561 pelleted and resuspended in Tris-buffered saline containing 10% glycerol (TBSG) and protease  
562 inhibitor cocktail (Roche, Complete EDTA-free). Cells were lysed by homogenization (Avestin)  
563 and ultracentrifuged at 100,000 g for 1 h to spin down membranes. The supernatants were then  
564 applied to a 5 mL-HiTrap(TM) Chelating HP Ni-affinity column pre-loaded with 0.1 M NiSO<sub>4</sub>  
565 and equilibrated with TBSG. The proteins were eluted from the column using FPLC (Akta) by  
566 applying a stepwise gradient of 25 mM, 50 mM, and finally 300 mM imidazole for protein  
567 elution. Elution was monitored by UV-absorption at 280 nm. The MlaC- and MlaD-containing  
568 fractions were then further purified by injecting into a HiLoad 120 ml-6/600 Superdex(TM) 200  
569 preparative grade size-exclusion column equilibrated in TBSG using a flow rate of 1 mL/min.  
570 The purity of the collected protein fractions was confirmed by SDS polyacrylamide gel  
571 electrophoresis. Proteins were diluted to 2 mg/mL and dialyzed overnight in 1 L TBSG at 4 °C  
572 with stirring. GPLs were extracted from 1 mg each of purified proteins MlaC and MlaD by the  
573 method of Bligh and Dyer and analyzed by LC-MS/MS as previously described.

574

575 **LC-MS/MS:**

576 Retention of PG, CL, PE, and Lyso-CL was achieved at a flow rate of 0.3 mL/min using mobile  
577 phase A [CHCl<sub>3</sub>/CH<sub>3</sub>OH/NH<sub>4</sub>OH (800:195:5 v/v/v)] and mobile phase B  
578 [CHCl<sub>3</sub>/CH<sub>3</sub>OH/NH<sub>4</sub>OH (600:340:5 v/v/v)]. The chromatography method used is a three-step  
579 gradient as described in the SI Materials and Methods of Dalebroux et al. (26). The samples were  
580 run on an Agilent Zorbax Rx-SIL silica column (2.1x100mm, 1.8-Micron) using an Agilent  
581 HPLC autosampler. Mass spectrometry was performed using an AB Sciex API4000 Qtrap with  
582 multiple reaction monitoring (MRM). The identities of the major GPLs present in the *A.*  
583 *baumannii* membrane were predicted by parent ion scans.

584

585 **Stable isotope assay development:**

586 The Q1/Q3 transitions of glycerolphospholipids from cells grown in 2-<sup>13</sup>C acetate were

587 determined using a Thermo Orbitrap LTQ. The integrated peak areas of both  $^{13}\text{C}$ -labeled and  
588 unlabeled GPLs from the AB Sciex API4000 Qtrap were used to calculate the ion-current ratios  
589 for each GPL species. The ratio of labeled GPL for each unique species can be calculated based  
590 on the following equation:

591  
592  $R_{\text{lab}} = R_i - R_b$  (57)

593  
594 Where  $R_i$  is the ion-current ratio of labeled GPL to unlabeled GPL within the sample and  $R_b$  is  
595 the ion-current ratio of samples before the administration of the tracer,  $^{13}\text{C}$ -acetate, and  
596 represents the natural background abundance of the stable isotope species within the bacterial  
597 membrane.  $R_{\text{lab}}$  approximates the molar ratio of labeled species to unlabeled species ( $n_{\text{lab}}/n_{\text{un}}$ )  
598 according to the equation  $(n_{\text{lab}}/n_{\text{un}}) = [R_i - R_b]/k$ , where  $k$  is the molar response factor of the  
599 instrument and is ideally equal to unity (57).

600  
601 To demonstrate that OM phospholipases will not distinguish between labeled and unlabeled GPL  
602 and therefore will not affect the ratio of labeled to unlabeled GPL obtained from this assay, we  
603 compared ratios of labeled and unlabeled GPL from wild type *A. baumannii* and deletion  
604 mutants in *pldA*. Bacteria were grown carrying either the empty pMMB::*kan* vector, or  
605 expressing the Walker box mutant MlaF-K55L. Accumulation of newly synthesized GPL was  
606 observed in those strains expressing MlaF-K55L when compared to the vector control, across  
607 various species of GPL. Of strains expressing the vector control, on average  $51.84\% \pm 1.07\%$   
608 and  $52.07\% \pm 1.23\%$  of newly synthesized PG C16:0/18:1 appeared on the inner membrane of  
609 wild type and  $\Delta pldA$ , respectively, after one hour incubation with  $^{13}\text{C}$  acetate, while  $66.33\% \pm$   
610  $1.23\%$  and  $62.60\% \pm 1.70\%$  of newly synthesized PG C16:0/18:1 accumulated at the inner  
611 membranes of wild type and  $\Delta pldA$  expressing MlaF-K55L. In vector controls strains,  $48.53\% \pm$   
612  $1.37\%$  and  $51.01\% \pm 0.55\%$  of newly synthesized PG C16:0/16:0 appeared on the inner  
613 membrane of wild type and  $\Delta pldA$ , respectively, after one hour incubation with  $^{13}\text{C}$  acetate,  
614 while  $62.98\% \pm 1.01\%$  and  $60.41\% \pm 1.25\%$  of newly synthesized PG C16:0/16:0 accumulated  
615 at the inner membranes of wild type and  $\Delta pldA$  expressing MlaF-K55L. In vector controls  
616 strains,  $50.17\% \pm 1.31\%$  and  $50.49\% \pm 1.15\%$  of newly synthesized PE C16:0/18:1 appeared on  
617 the inner membrane of wild type and  $\Delta pldA$ , respectively, while  $60.14\% \pm 0.93\%$  and  $62.06\% \pm$



618 1.07% of newly synthesized PE C16:0/18:1 accumulated at the inner membranes of wild type  
619 and  $\Delta pldA$  expressing MlaF-K55L.

620

### 621 **Stable isotope GPL analysis and culture conditions:**

622 Cultures of *A. baumannii* ATCC 17978 were grown in M63 media containing 5 mM sodium  
623 acetate and 4 mM MgCl<sub>2</sub> to OD<sub>600</sub> 0.4, then washed and resuspended in media containing 5 mM  
624 2-<sup>13</sup>C sodium acetate (Cat. No. CLM-381-0, Cambridge Isotope Laboratories, Inc.). Membrane  
625 fractions were isolated from both wild type and *mia* mutant *A. baumannii* at simultaneous time  
626 points, and GPL were extracted and assessed using previously established LC-MS/MS methods  
627 with additional MRM values to account for the increased m/z ratios of <sup>13</sup>C-labeled GPL. MRMs  
628 were selected to account for PG and PE having acyl chains of either C16:0/16:0, C16:0/18:1, and  
629 C18:1/18:1 as these were determined by total ion scan MS to be the predominant species of PG  
630 and PE GPL. Pulse experiments were performed at least twice for each mutant. Further details of  
631 assay development are described in SI Materials and Methods.

632

### 633 **Acknowledgements**

634 We thank Dale Whittington and Dr. Scott Edgar at the Mass Spectrometry Center, Department of  
635 Medicinal Chemistry, University of Washington for technical help with MS analysis; and Mauna  
636 Edrozo for technical help.

637

### 638 **Author Contributions**

639 CK carried out all microbiology experiments, purified membranes and lipids and analyzed them  
640 by mass spectrometry, and wrote the paper with SIM. JF purified the Mla protein complex,  
641 analyzed its components and wrote that section of the paper. HDK participated in bioinformatic  
642 analysis of Mla and experimental design. ZDD advised as to the mass spectrometry lipid analysis  
643 and participated in data analysis. JB performed electron microscopy analysis of the protein  
644 complex and wrote that section of the paper. AB and JMK performed electron microscopy  
645 analysis of the protein complex. SIM planned and supervised all the experiments, developed the  
646 genetic screen for OM permeability, analyzed data, and wrote the paper with CK.

647

### 648 **Author Information**

649 Authors have no competing financial interests. Correspondence and Requests for materials  
650 should be addressed to SIM ([millersi@uw.edu](mailto:millersi@uw.edu)).

651

## 652 **Data Availability**

653 The cryo-EM map has been deposited in the Electron Microscopy Data Bank with accession  
654 code EMD-8738 (8.7 Å map). The coordinates for the MlaBDEF model have been deposited to  
655 the PDB-dev database.

656

## 657 **References:**

- 658 1. Zhang YM, Rock CO. Membrane lipid homeostasis in bacteria. *Nat Rev Microbiol.*  
659 2008;6(3):222-33.
- 660 2. Pelletier MR, Casella LG, Jones JW, Adams MD, Zurawski DV, Hazlett KR, et al.  
661 Unique structural modifications are present in the lipopolysaccharide from colistin-resistant  
662 strains of *Acinetobacter baumannii*. *Antimicrob Agents Chemother.* 2013;57(10):4831-40.
- 663 3. Bishop RE. Emerging roles for anionic non-bilayer phospholipids in fortifying the outer  
664 membrane permeability barrier. *J Bacteriol.* 2014;196(18):3209-13.
- 665 4. Okuda S, Tokuda H. Lipoprotein sorting in bacteria. *Annu Rev Microbiol.* 2011;65:239-  
666 59.
- 667 5. Okuda S, Sherman DJ, Silhavy TJ, Ruiz N, Kahne D. Lipopolysaccharide transport and  
668 assembly at the outer membrane: the PEZ model. *Nat Rev Microbiol.* 2016;14(6):337-45.
- 669 6. Chmelnitsky I, Shklyar M, Hermesh O, Navon-Venezia S, Edgar R, Carmeli Y. Unique  
670 genes identified in the epidemic extremely drug-resistant KPC-producing *Klebsiella pneumoniae*  
671 sequence type 258. *J Antimicrob Chemother.* 2012.
- 672 7. Abbo A, Navon-Venezia S, Hammer-Muntz O, Krichali T, Siegman-Igra Y, Carmeli Y.  
673 Multidrug-resistant *Acinetobacter baumannii*. *Emerg Infect Dis.* 2005;11(1):22-9.
- 674 8. Strauch KL, Beckwith J. An *Escherichia coli* mutation preventing degradation of  
675 abnormal periplasmic proteins. *Proc Natl Acad Sci U S A.* 1988;85(5):1576-80.
- 676 9. Lopes J, Gottfried S, Rothfield L. Leakage of periplasmic enzymes by mutants of  
677 *Escherichia coli* and *Salmonella typhimurium*: isolation of "periplasmic leaky" mutants. *J*  
678 *Bacteriol.* 1972;109(2):520-5.
- 679 10. Helander IM, Mattila-Sandholm T. Permeability barrier of the gram-negative bacterial  
680 outer membrane with special reference to nisin. *Int J Food Microbiol.* 2000;60(2-3):153-61.
- 681 11. Murata T, Tseng W, Guina T, Miller SI, Nikaido H. PhoPQ-mediated regulation  
682 produces a more robust permeability barrier in the outer membrane of *Salmonella enterica*  
683 serovar typhimurium. *J Bacteriol.* 2007;189(20):7213-22.
- 684 12. Malinverni JC, Silhavy TJ. An ABC transport system that maintains lipid asymmetry in  
685 the gram-negative outer membrane. *Proc Natl Acad Sci U S A.* 2009;106(19):8009-14.
- 686 13. Nikaido H. Molecular basis of bacterial outer membrane permeability revisited.  
687 *Microbiol Mol Biol Rev.* 2003;67(4):593-656.
- 688 14. Vaara M. Agents that increase the permeability of the outer membrane. *Microbiol Rev.*  
689 1992;56(3):395-411.

- 690 15. Walker JE, Saraste M, Runswick MJ, Gay NJ. Distantly related sequences in the alpha-  
691 and beta-subunits of ATP synthase, myosin, kinases and other ATP-requiring enzymes and a  
692 common nucleotide binding fold. *Embo J.* 1982;1(8):945-51.
- 693 16. Hanson PI, Whiteheart SW. AAA+ proteins: have engine, will work. *Nat Rev Mol Cell*  
694 *Biol.* 2005;6(7):519-29.
- 695 17. Davidson AL, Sharma S. Mutation of a single MalK subunit severely impairs maltose  
696 transport activity in *Escherichia coli*. *J Bacteriol.* 1997;179(17):5458-64.
- 697 18. Wilkens S. Structure and mechanism of ABC transporters. *F1000Prime Rep.* 2015;7:14.
- 698 19. Thong S, Ercan B, Torta F, Fong ZY, Wong HY, Wenk MR, et al. Defining key roles for  
699 auxiliary proteins in an ABC transporter that maintains bacterial outer membrane lipid  
700 asymmetry. *Elife.* 2016;5.
- 701 20. Ekiert DC, Bhabha G, Isom GL, Greenan G, Ovchinnikov S, Henderson IR, et al.  
702 Architectures of Lipid Transport Systems for the Bacterial Outer Membrane. *Cell.*  
703 2017;169(2):273-85 e17.
- 704 21. Ovchinnikov S, Park H, Varghese N, Huang PS, Pavlopoulos GA, Kim DE, et al. Protein  
705 structure determination using metagenome sequence data. *Science.* 2017;355(6322):294-8.
- 706 22. Bergeron JR, Worrall LJ, Sgourakis NG, DiMaio F, Pfuetzner RA, Felise HB, et al. A  
707 refined model of the prototypical *Salmonella* SPI-1 T3SS basal body reveals the molecular basis  
708 for its assembly. *PLoS Pathog.* 2013;9(4):e1003307.
- 709 23. Khare D, Oldham ML, Orelle C, Davidson AL, Chen J. Alternating access in maltose  
710 transporter mediated by rigid-body rotations. *Mol Cell.* 2009;33(4):528-36.
- 711 24. Oldham ML, Chen S, Chen J. Structural basis for substrate specificity in the *Escherichia*  
712 *coli* maltose transport system. *Proc Natl Acad Sci U S A.* 2013;110(45):18132-7.
- 713 25. Huang YM, Miao Y, Munguia J, Lin L, Nizet V, McCammon JA. Molecular dynamic  
714 study of MlaC protein in Gram-negative bacteria: conformational flexibility, solvent effect and  
715 protein-phospholipid binding. *Protein Sci.* 2016;25(8):1430-7.
- 716 26. Dalebroux ZD, Matamouros S, Whittington D, Bishop RE, Miller SI. PhoPQ regulates  
717 acidic glycerophospholipid content of the *Salmonella Typhimurium* outer membrane. *Proc Natl*  
718 *Acad Sci U S A.* 2014;111(5):1963-8.
- 719 27. Jia W, El Zoeiby A, Petruzzello TN, Jayabalasingham B, Seyedirashti S, Bishop RE.  
720 Lipid trafficking controls endotoxin acylation in outer membranes of *Escherichia coli*. *J Biol*  
721 *Chem.* 2004;279(43):44966-75.
- 722 28. Bishop RE, Gibbons HS, Guina T, Trent MS, Miller SI, Raetz CR. Transfer of palmitate  
723 from phospholipids to lipid A in outer membranes of gram-negative bacteria. *Embo J.*  
724 2000;19(19):5071-80.
- 725 29. Dekker N. Outer-membrane phospholipase A: known structure, unknown biological  
726 function. *Mol Microbiol.* 2000;35(4):711-7.
- 727 30. Kumari S, Beatty CM, Browning DF, Busby SJ, Simel EJ, Hovel-Miner G, et al.  
728 Regulation of acetyl coenzyme A synthetase in *Escherichia coli*. *J Bacteriol.* 2000;182(15):4173-  
729 9.
- 730 31. Istivan TS, Coloe PJ. Phospholipase A in Gram-negative bacteria and its role in  
731 pathogenesis. *Microbiology.* 2006;152(Pt 5):1263-74.
- 732 32. Donohue-Rolfe AM, Schaechter M. Translocation of phospholipids from the inner to the  
733 outer membrane of *Escherichia coli*. *Proc Natl Acad Sci U S A.* 1980;77(4):1867-71.

- 734 33. Abreu MS, Moreno MJ, Vaz WL. Kinetics and thermodynamics of association of a  
735 phospholipid derivative with lipid bilayers in liquid-disordered and liquid-ordered phases.  
736 *Biophys J*. 2004;87(1):353-65.
- 737 34. van Meer G, Halter D, Sprong H, Somerharju P, Egmond MR. ABC lipid transporters:  
738 extruders, flippases, or floppase activators? *FEBS Lett*. 2006;580(4):1171-7.
- 739 35. Roston RL, Gao J, Murcha MW, Whelan J, Benning C. TGD1, -2, and -3 proteins  
740 involved in lipid trafficking form ATP-binding cassette (ABC) transporter with multiple  
741 substrate-binding proteins. *J Biol Chem*. 2012;287(25):21406-15.
- 742 36. Benning C. A role for lipid trafficking in chloroplast biogenesis. *Prog Lipid Res*.  
743 2008;47(5):381-9.
- 744 37. Hurlock AK, Roston RL, Wang K, Benning C. Lipid trafficking in plant cells. *Traffic*.  
745 2014;15(9):915-32.
- 746 38. Abellon-Ruiz J, Kaptan SS, Basle A, Claudi B, Bumann D, Kleinekathofer U, et al.  
747 Structural basis for maintenance of bacterial outer membrane lipid asymmetry. *Nat Microbiol*.  
748 2017;2(12):1616-23.
- 749 39. Casali N, Riley LW. A phylogenomic analysis of the Actinomycetales mce operons.  
750 *BMC Genomics*. 2007;8:60.
- 751 40. Geisinger E, Isberg RR. Antibiotic modulation of capsular exopolysaccharide and  
752 virulence in *Acinetobacter baumannii*. *PLoS Pathog*. 2015;11(2):e1004691.
- 753 41. Kulasekara HD, Ventre I, Kulasekara BR, Lazdunski A, Filloux A, Lory S. A novel two-  
754 component system controls the expression of *Pseudomonas aeruginosa* fimbrial cup genes. *Mol*  
755 *Microbiol*. 2005;55(2):368-80.
- 756 42. Rietsch A, Vallet-Gely I, Dove SL, Mekalanos JJ. ExsE, a secreted regulator of type III  
757 secretion genes in *Pseudomonas aeruginosa*. *Proc Natl Acad Sci U S A*. 2005;102(22):8006-11.
- 758 43. Chun KT, Edenberg HJ, Kelley MR, Goebel MG. Rapid amplification of uncharacterized  
759 transposon-tagged DNA sequences from genomic DNA. *Yeast*. 1997;13(3):233-40.
- 760 44. Osborn MJ, Gander JE, Parisi E. Mechanism of assembly of the outer membrane of  
761 *Salmonella typhimurium*. Site of synthesis of lipopolysaccharide. *J Biol Chem*.  
762 1972;247(12):3973-86.
- 763 45. Dalebroux ZD, Edrozo MB, Pfuetzner RA, Ressler S, Kulasekara BR, Blanc MP, et al.  
764 Delivery of cardiolipins to the *Salmonella* outer membrane is necessary for survival within host  
765 tissues and virulence. *Cell Host Microbe*. 2015;17(4):441-51.
- 766 46. Bligh EG, Dyer WJ. A rapid method of total lipid extraction and purification. *Can J*  
767 *Biochem Physiol*. 1959;37(8):911-7.
- 768 47. Suloway C, Pulokas J, Fellmann D, Cheng A, Guerra F, Quispe J, et al. Automated  
769 molecular microscopy: the new Legion system. *J Struct Biol*. 2005;151(1):41-60.
- 770 48. Zheng SQ, Palovcak E, Armache JP, Verba KA, Cheng Y, Agard DA. MotionCor2:  
771 anisotropic correction of beam-induced motion for improved cryo-electron microscopy. *Nat*  
772 *Methods*. 2017;14(4):331-2.
- 773 49. Rohou A, Grigorieff N. CTFFIND4: Fast and accurate defocus estimation from electron  
774 micrographs. *J Struct Biol*. 2015;192(2):216-21.
- 775 50. Lander GC, Stagg SM, Voss NR, Cheng A, Fellmann D, Pulokas J, et al. Appion: an  
776 integrated, database-driven pipeline to facilitate EM image processing. *J Struct Biol*.  
777 2009;166(1):95-102.
- 778 51. Scheres SH. RELION: implementation of a Bayesian approach to cryo-EM structure  
779 determination. *J Struct Biol*. 2012;180(3):519-30.

- 780 52. Kimanius D, Forsberg BO, Scheres SH, Lindahl E. Accelerated cryo-EM structure  
781 determination with parallelisation using GPUs in RELION-2. *Elife*. 2016;5.  
782 53. Tang G, Peng L, Baldwin PR, Mann DS, Jiang W, Rees I, et al. EMAN2: an extensible  
783 image processing suite for electron microscopy. *J Struct Biol*. 2007;157(1):38-46.  
784 54. Kelley LA, Mezulis S, Yates CM, Wass MN, Sternberg MJ. The Phyre2 web portal for  
785 protein modeling, prediction and analysis. *Nat Protoc*. 2015;10(6):845-58.  
786 55. Pettersen EF, Goddard TD, Huang CC, Couch GS, Greenblatt DM, Meng EC, et al.  
787 UCSF Chimera--a visualization system for exploratory research and analysis. *J Comput Chem*.  
788 2004;25(13):1605-12.  
789 56. DiMaio F, Leaver-Fay A, Bradley P, Baker D, Andre I. Modeling symmetric  
790 macromolecular structures in Rosetta3. *PLoS One*. 2011;6(6):e20450.  
791 57. MacCoss MJ, Toth MJ, Matthews DE. Evaluation and optimization of ion-current ratio  
792 measurements by selected-ion-monitoring mass spectrometry. *Anal Chem*. 2001;73(13):2976-84.  
793

## 794 **FIGURE LEGENDS**

### 795 **Fig. 1. Disruption of the Mla system results in an altered outer membrane barrier. (A)**

796 Genomic organization of the *A. baumannii mlaFEDCB* operon and its predicted products.

797 Triangles indicate the position of four independent transposon insertions, isolated in a screen for  
798 genes involved in outer membrane integrity. (B) Ethidium bromide uptake assay of outer

799 membrane permeability of  $\Delta mla$  mutants and complemented strains. A.U., arbitrary units. Lines  
800 shown depict the average of three technical replicates. (C) Ethidium bromide uptake assay of

801 outer membrane permeability following plasmid-based expression of MlaF, compared to its  
802 dominant negative version, MlaF<sup>K55L</sup>. Lines shown depict the average of three technical

803 replicates. (D) Minimum inhibitory concentration (MIC) of select antibiotics in *A. baumannii*.

804 \*Indicates wild type *A. baumannii* containing pMMB plasmid constructs, and cultures grown  
805 with the addition of kanamycin (25  $\mu\text{g}/\text{mL}$ ) to maintain plasmids and 50  $\mu\text{M}$  IPTG for induction.  
806

### 807 **Fig. 2. Structure of the abMlaBDEF complex. (A)** Cryo-EM mal of abMlaBDEF (grey), with

808 structural models for MlaD, MlaE, MlaB and MlaF (in magenta, yellow, cyan and green

809 respectively) docked at their putative location, as viewed from the side and bottom. The density

810 for most helices is clearly resolved. (B) Cartoon representation of the MlaD hexameric model,

811 with each subunit in grey, orange, yellow, magenta, cyan and green respectively. The putative

812 position of the abMlaD insert is shown. (C) Cartoon representation of the MlaB and MlaF

813 dimeric model, with MlaB in light and dark cyan and MlaF in light and dark green. (D) Cartoon

814 representation of the MlaE dimeric model (in orange and yellow). (E) Comparison of the MlaF



815 domain arrangement in the EM map to that of the Maltose transporter ATPase MalK. The two  
816 chains of MlaD (in light and dark green) superimpose well to those of MalK (in cyan and dark  
817 blue) in the pre-translocation conformation (left, PDB ID: 4KHZ), while a clear rotation is  
818 observed compared to the ATP-bound outward-facing conformation (right, PDB ID: 4KI0).

819

820 **Fig. 3. Localization of the 6 TM helices from MlaD.** (A) Reference-free 2D classes generated  
821 from the set of particles used to generate the abMlaBDEF structure, corresponding to side views.  
822 A range of orientations for the periplasmic domain is observed. (B) Structure of abMlaBDEF,  
823 generated using a subset of the most homogenous ~ 8,000 particles. Some features of the map  
824 shown in Figure 3C are not present, but the overall structure is similar. Six well-defined helices  
825 in the central TM region are visible. (C) Sections along the vertical axis, corresponding to the  
826 three red lines shown in B, is shown on the left. The six-fold axis of MlaD is visible in the  
827 periplasmic region, but this breaks down in the TM region, where the six helices are asymmetric.  
828 An angular representation of the six helices is represented on the right.

829

830

831 **Fig. 4. Outer membrane glycerophospholipid levels are reduced in  $\Delta mlaC$  mutant.** (A)  
832 Identification of inner and outer membrane phospholipids of wild type *A. baumannii* and  $\Delta mlaC$   
833 using 2D thin-layer chromatography. PE, phosphatidylethanolamine; PG, phosphatidylglycerol;  
834 CL, cardiolipin. (B) LC-MS/MS quantification of isolated inner and outer membrane  
835 glycerophospholipids. Error bars indicate  $\pm$  s.e.m. (n = 3).

836

837 **Fig. 5. Newly synthesized glycerophospholipids accumulate at the inner membrane of Mla**  
838 **mutants.** (A) LC-MS/MS quantification of  $^{13}\text{C}$  labelled/unlabelled glycerophospholipids in  
839 isolated membrane fractions over time after growth in  $2\text{-}^{13}\text{C}$  acetate in  $\Delta mlaF$  and  
840 complemented strain. Facet labels on the right indicate the specific glycerophospholipid species  
841 analyzed and the acyl chain length. PG, phosphatidylglycerol; PE, phosphatidylethanolamine.  
842 Shown is representative data from repeated experiments. (B) LC-MS/MS quantification of  $^{13}\text{C}$   
843 labelled/un- labeled glycerophospholipids in isolated membrane fractions following plasmid-  
844 based expression of MlaF compared to its dominant negative version, MlaF<sup>K55L</sup>. Facet labels on  
845 the right indicate the specific glycerophospholipid species analyzed and the acyl chain length.



846 PG, phosphatidylglycerol; PE, phosphatidylethanolamine. Shown is representative data from  
847 repeated experiments. (C) Relative proportion of newly synthesized GPL on IM and OM after  
848 one hour growth in 2-<sup>13</sup>C acetate. Error bars represent  $\pm$  s.d. (n = 2). Statistical analyses  
849 performed using a Student's *t* test. *p*-Value: \*,  $p < 0.05$ ; \*\*,  $p < 0.01$ .

850

851 **Fig. 6. The multicomponent Mla system transports glycerophospholipids from the inner**  
852 **membrane to the outer membrane of *A. baumannii*.** A schematic of glycerophospholipid  
853 transport to the Gram-negative bacterial outer membrane by the Mla system.

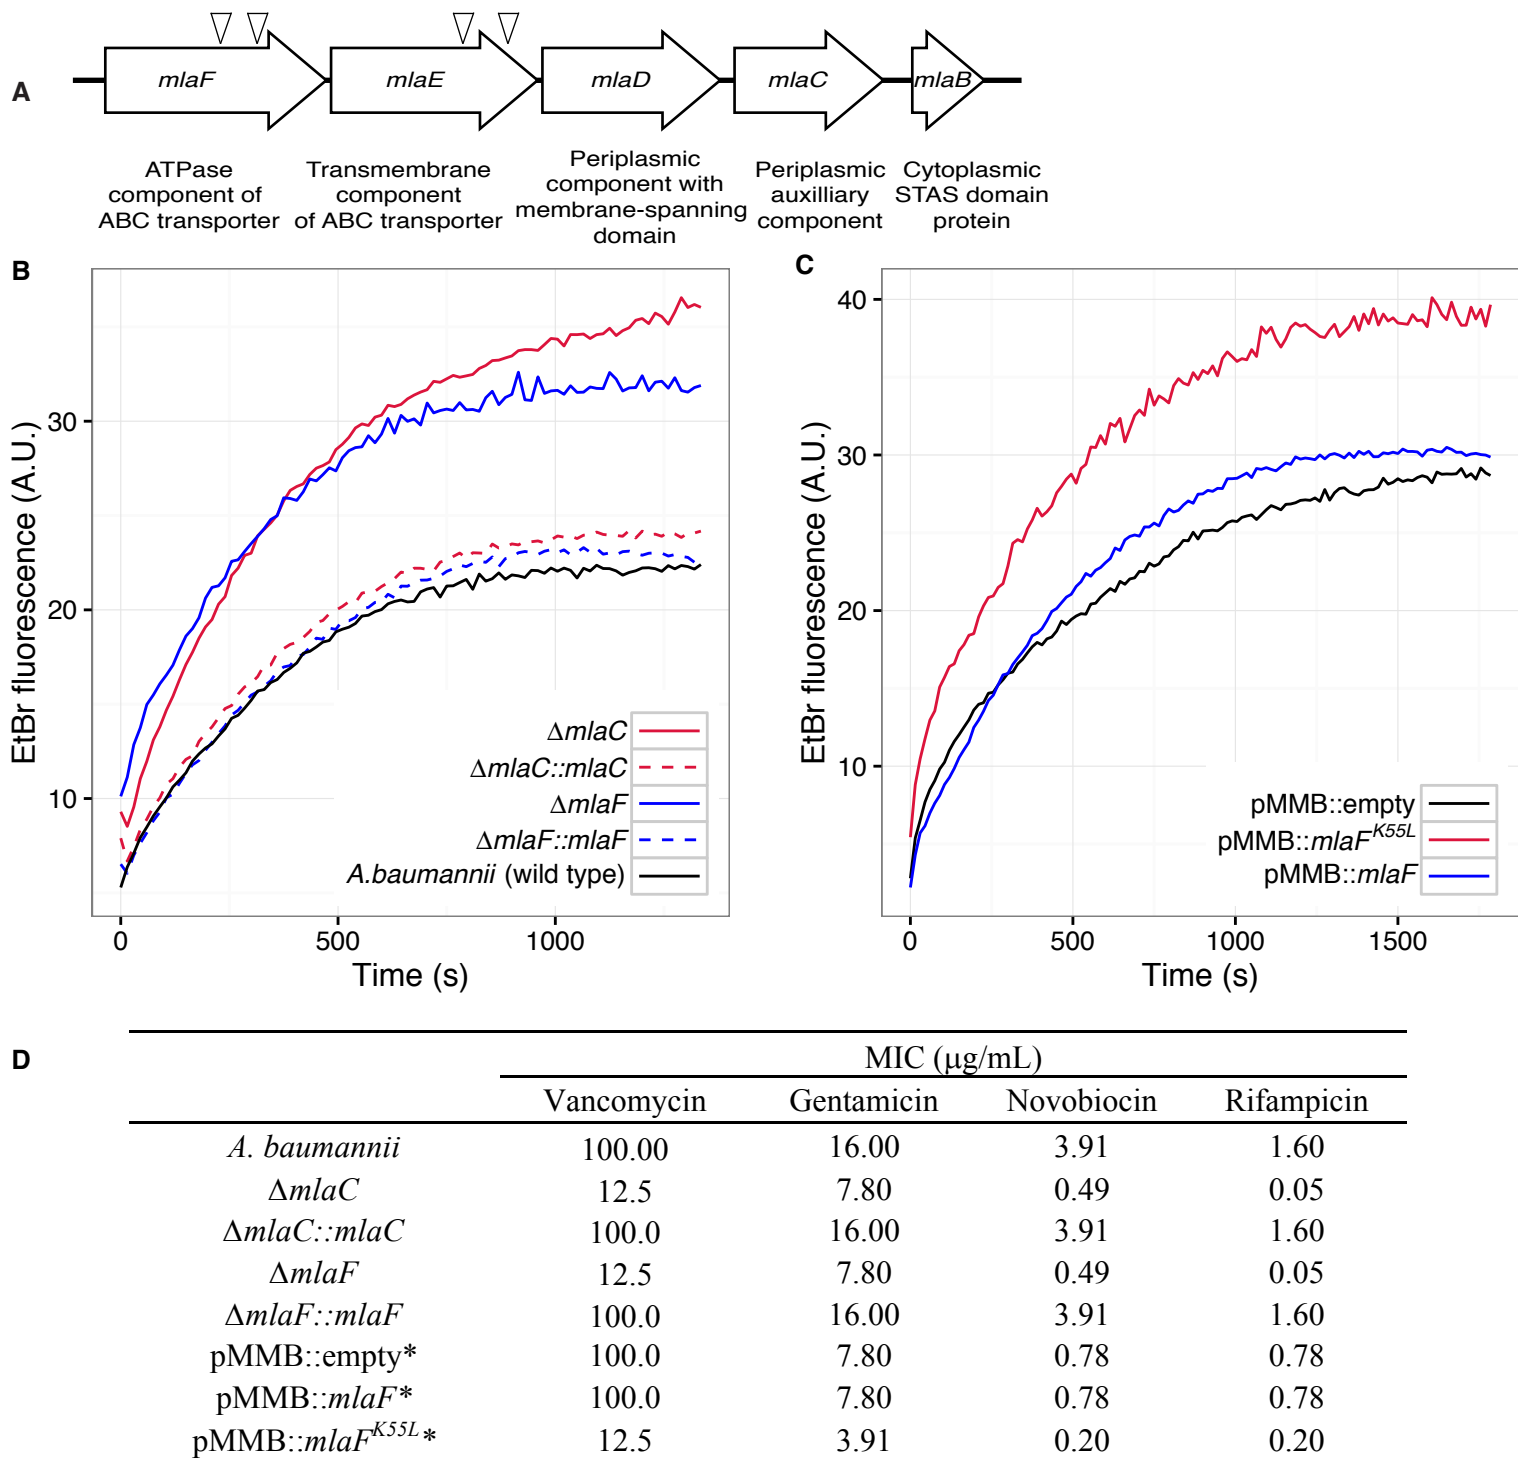

**Fig. 1. Disruption of the Mla system results in an altered outer membrane barrier.** (A) Genomic organization of the *A. baumannii* *mlaFEDCB* operon and its predicted products. Triangles indicate the position of four independent transposon insertions, isolated in a screen for genes involved in outer membrane integrity. (B) Ethidium bromide uptake assay of outer membrane permeability of  $\Delta mla$  mutants and complemented strains. A.U., arbitrary units. Lines shown depict the average of three technical replicates. (C) Ethidium bromide uptake assay of outer membrane permeability following plasmid-based expression of MlaF, compared to its dominant negative version, MlaF<sup>K55L</sup>. Lines shown depict the average of three technical replicates. (D) Minimum inhibitory concentration (MIC) of select antibiotics in *A. baumannii*. \*Indicates wild type *A. baumannii* containing pMMB plasmid constructs, and cultures grown with the addition of kanamycin (25  $\mu\text{g}/\text{mL}$ ) to maintain plasmids and 50  $\mu\text{M}$  IPTG for induction.

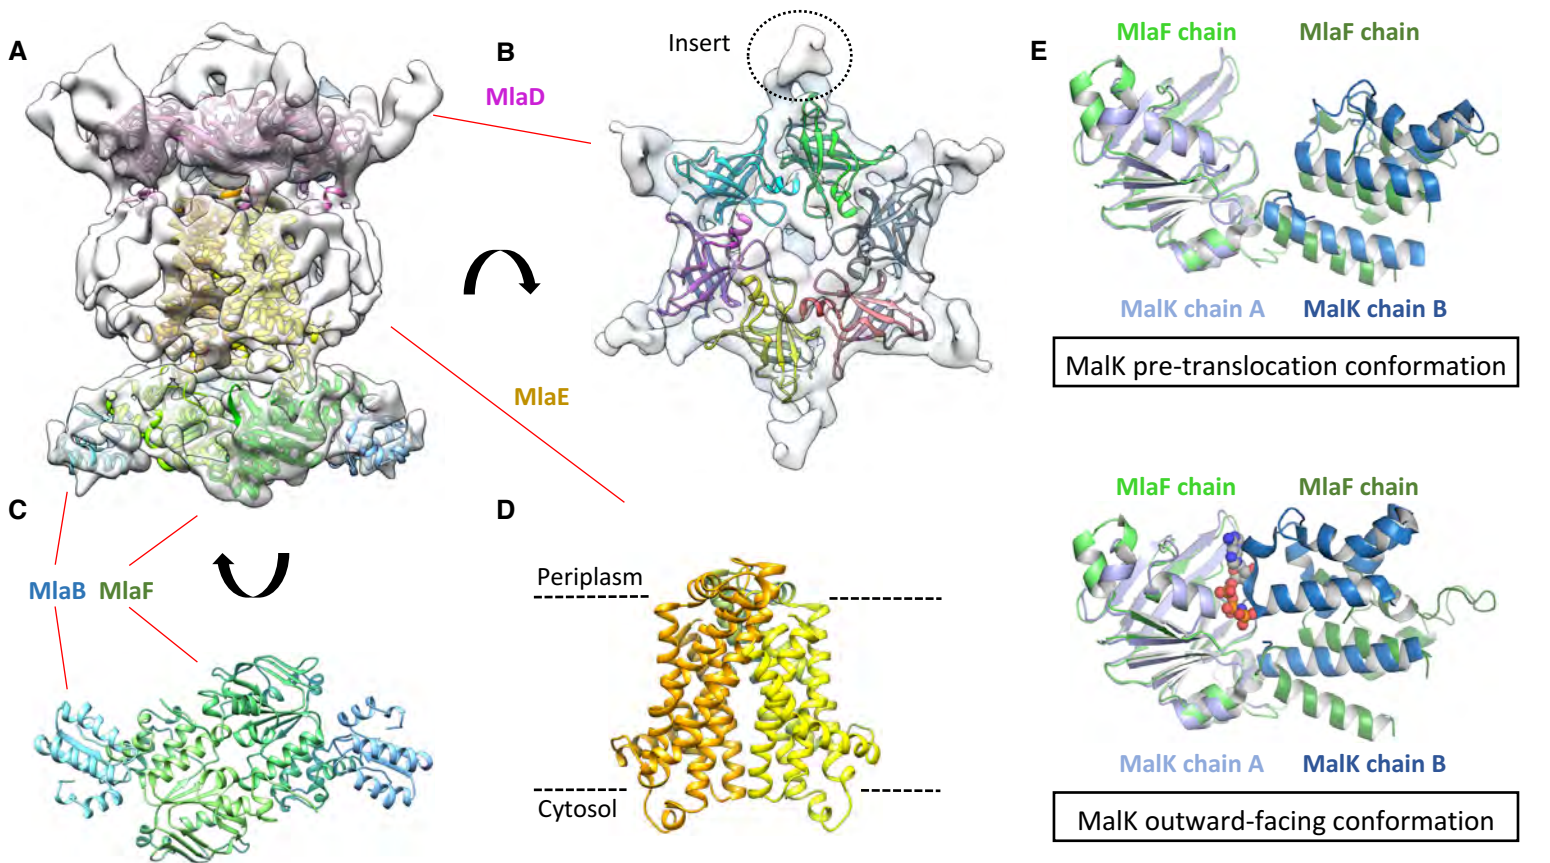

**Fig. 2. Structure of the abMlaBDEF complex.** (A) Cryo-EM map of abMlaBDEF (grey), with structural models for MlaD, MlaE, MlaB and MlaF (in magenta, yellow, cyan and green respectively) docked at their putative location, as viewed from the side and bottom. The density for most helices is clearly resolved. (B) Cartoon representation of the MlaD hexameric model, with each subunit in grey, orange, yellow, magenta, cyan and green respectively. The putative position of the abMlaD insert is shown. (C) Cartoon representation of the MlaB and MlaF dimeric model, with MlaB in light and dark cyan and MlaF in light and dark green. (D) Cartoon representation of the MlaE dimeric model (in orange and yellow). (E) Comparison of the MlaF domain arrangement in the EM map to that of the Maltose transporter ATPase MalK. The two chains of MlaD (in light and dark green) superimpose well to those of MalK (in cyan and dark blue) in the pre-translocation conformation (left, PDB ID: 4KHZ), while a clear rotation is observed compared to the ATP-bound outward-facing conformation (right, PDB ID: 4KI0).

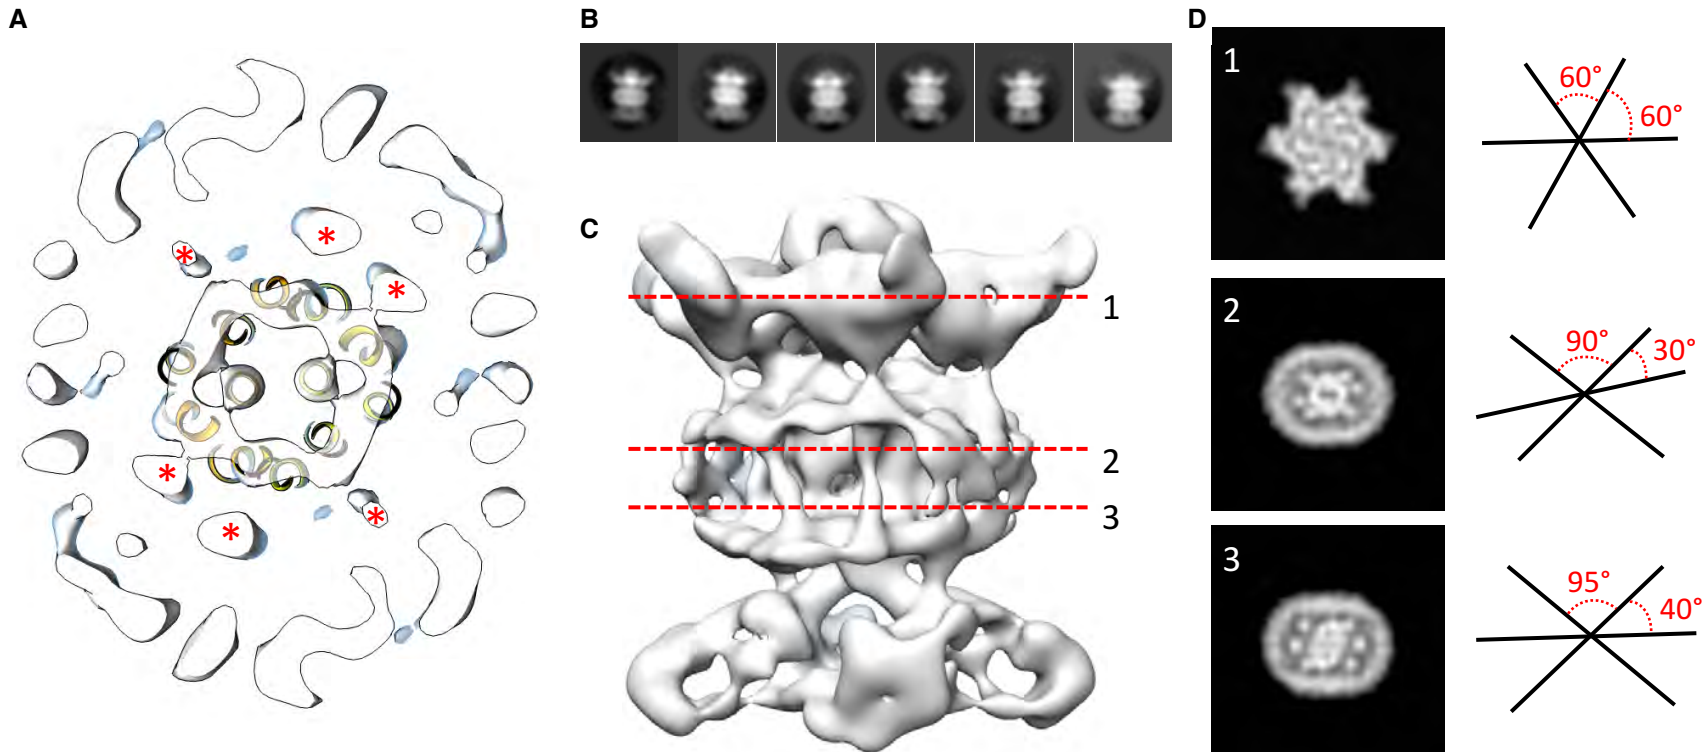

**Fig. 3. Localization of the 6 TM helices from MlaD.** (A) lateral section of the abMlaBDEF EM map, with the MlaE model in yellow. Density attributed to the MlaD N-terminal helices are indicated with a red star. (B) Reference-free 2D classes generated from the set of particles used to generate the abMlaBDEF structure, corresponding to side views. A range of orientations for the periplasmic domain is observed. (C) Structure of abMlaBDEF, generated using a subset of the most homogenous  $\sim 8,000$  particles. Some features of the map shown in 3A are not present, but the overall structure is similar. Six well-defined helices in the central TM region are visible. (D) Sections along the vertical axis, corresponding to the three red lines shown in B, is shown on the left. The six-fold axis of MlaD is visible in the periplasmic region, but this breaks down in the TM region, where the six helices are asymmetric. An angular representation of the six helices is represented on the right.

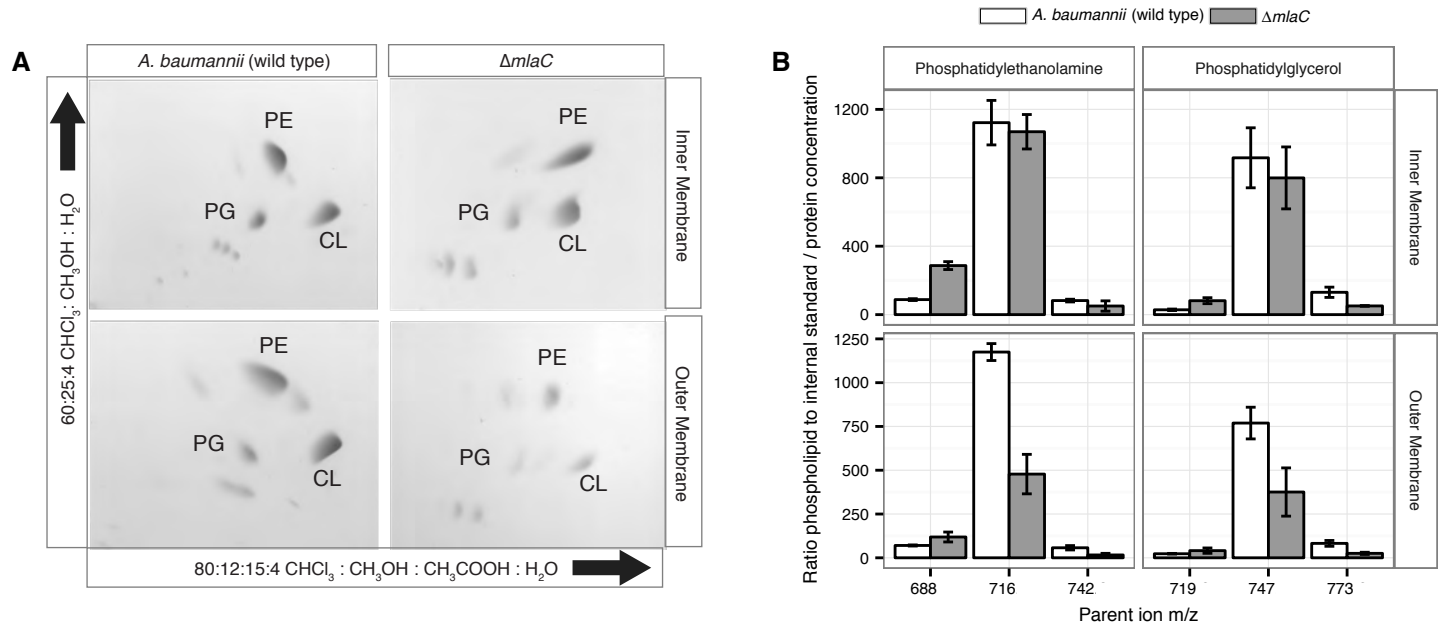

**Fig 4. Outer membrane glycerophospholipid levels are reduced in  $\Delta mIaC$  mutant.** (A) Identification of inner and outer membrane phospholipids of wild type *A. baumannii* and  $\Delta mIaC$  using 2D thin-layer chromatography. PE, phosphatidylethanolamine; PG, phosphatidylglycerol; CL, cardiolipin. (B) LC-MS/MS quantification of isolated inner and outer membrane glycerophospholipids. Error bars indicate  $\pm$  s.e.m. ( $n = 3$ ).

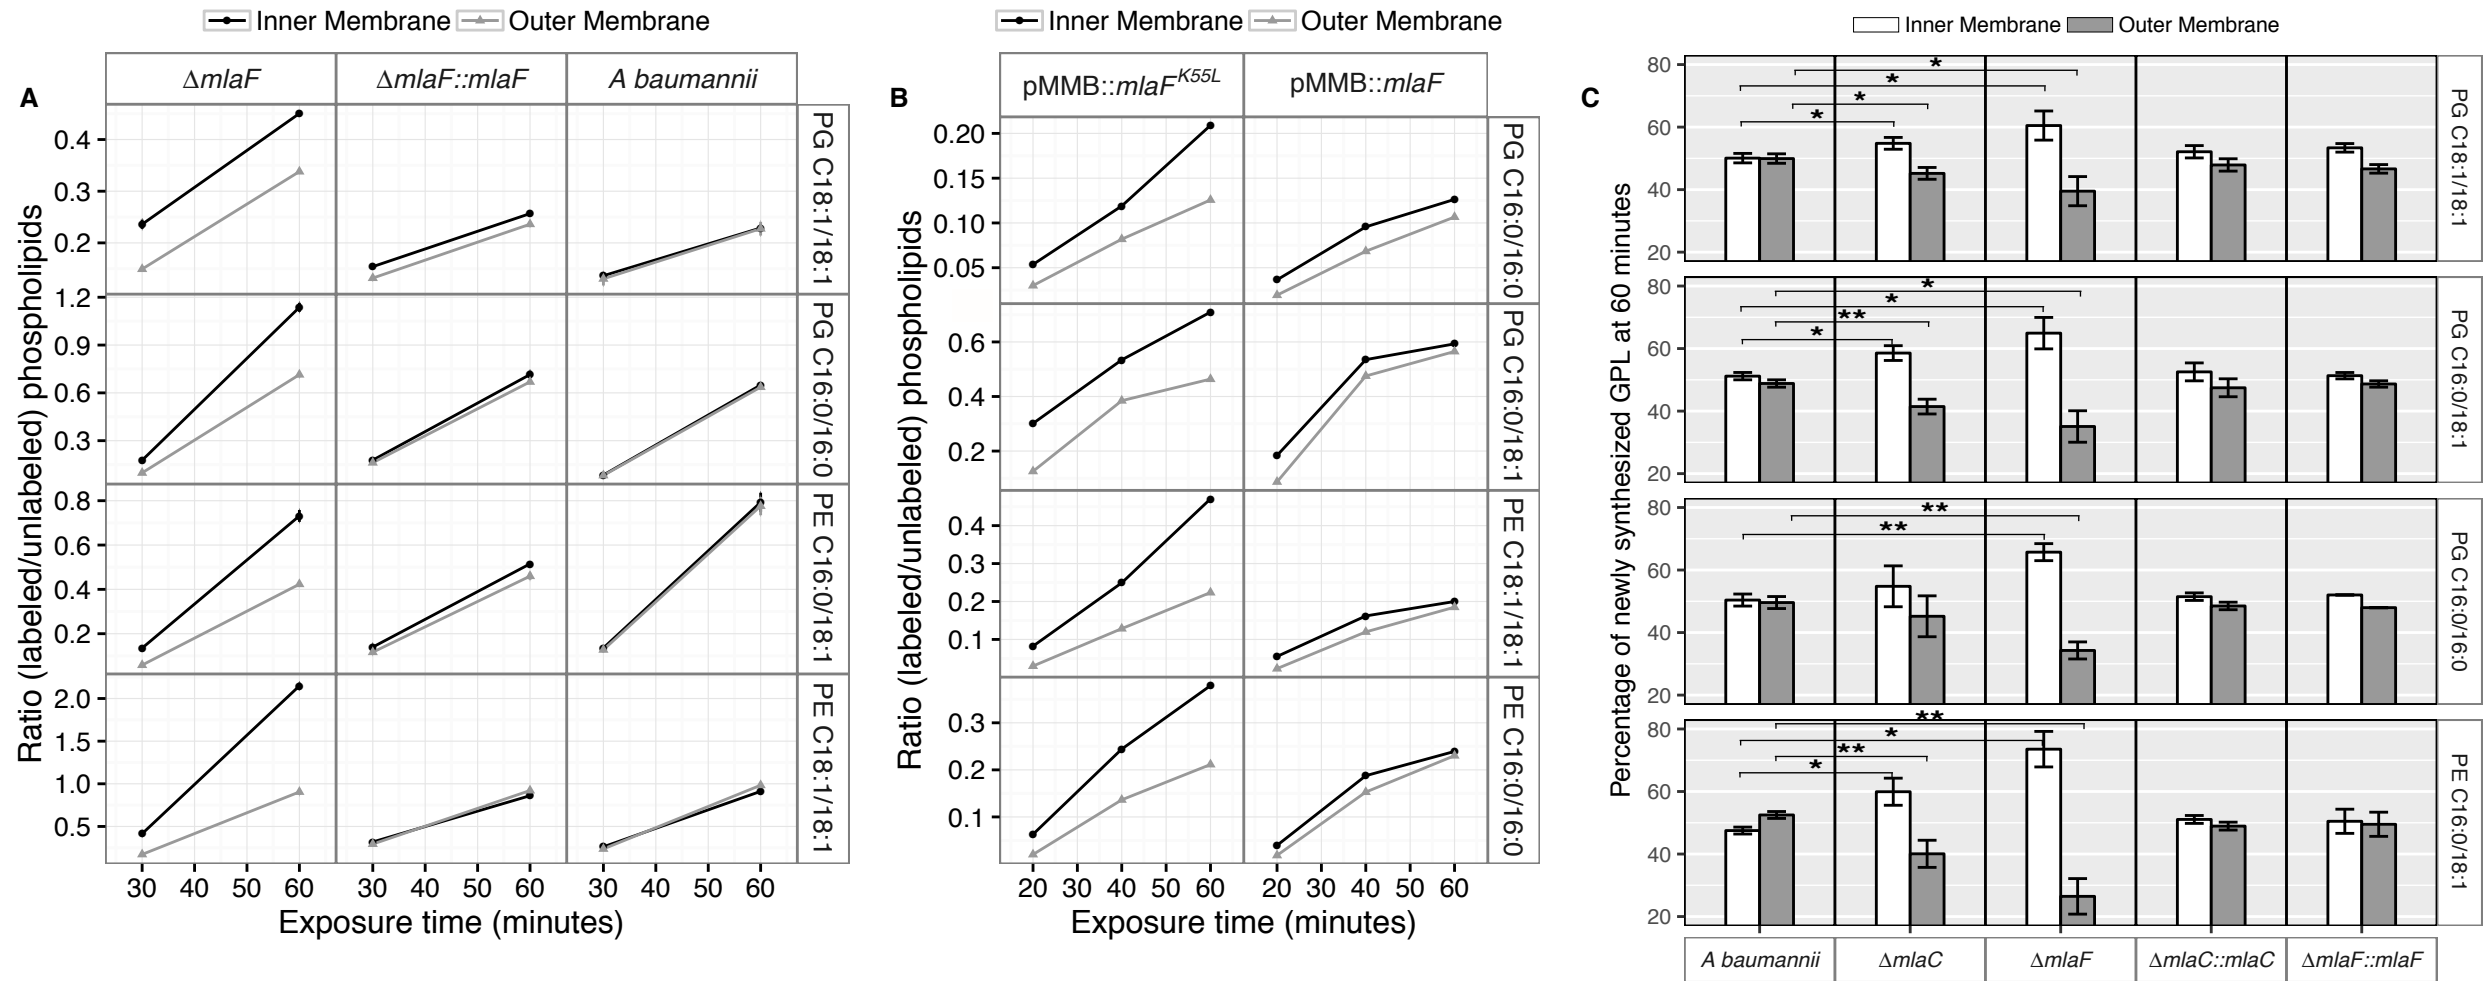

**Fig. 5. Newly synthesized glycerophospholipids accumulate at the inner membrane of *Mla* mutants.** (A) LC-MS/MS quantification of <sup>13</sup>C labelled/unlabeled glycerophospholipids in isolated membrane fractions over time after growth in 2-<sup>13</sup>C acetate in  $\Delta mIaF$  and complemented strain. Facet labels on the right indicate the specific glycerophospholipid species analyzed and the acyl chain length. PG, phosphatidylglycerol; PE, phosphatidylethanolamine. Shown is representative data from repeated experiments. Error bars represent  $\pm$  s.d. (n = 2) for technical replicates. (B) LC-MS/MS quantification of <sup>13</sup>C labelled/unlabeled glycerophospholipids in isolated membrane fractions following plasmid-based expression of *MlaF* compared to its dominant negative version, *MlaF*<sup>K55L</sup>. Facet labels on the right indicate the specific glycerophospholipid species analyzed and the acyl chain length. PG, phosphatidylglycerol; PE, phosphatidylethanolamine. Shown is representative data from repeated experiments. (C) Relative proportion of newly synthesized GPL on IM and OM after one hour growth in 2-<sup>13</sup>C acetate. Error bars represent  $\pm$  s.d. (n = 2). Statistical analyses performed using a Student's t test. p-Value: \*, p < 0.05; \*\*, p < 0.01.



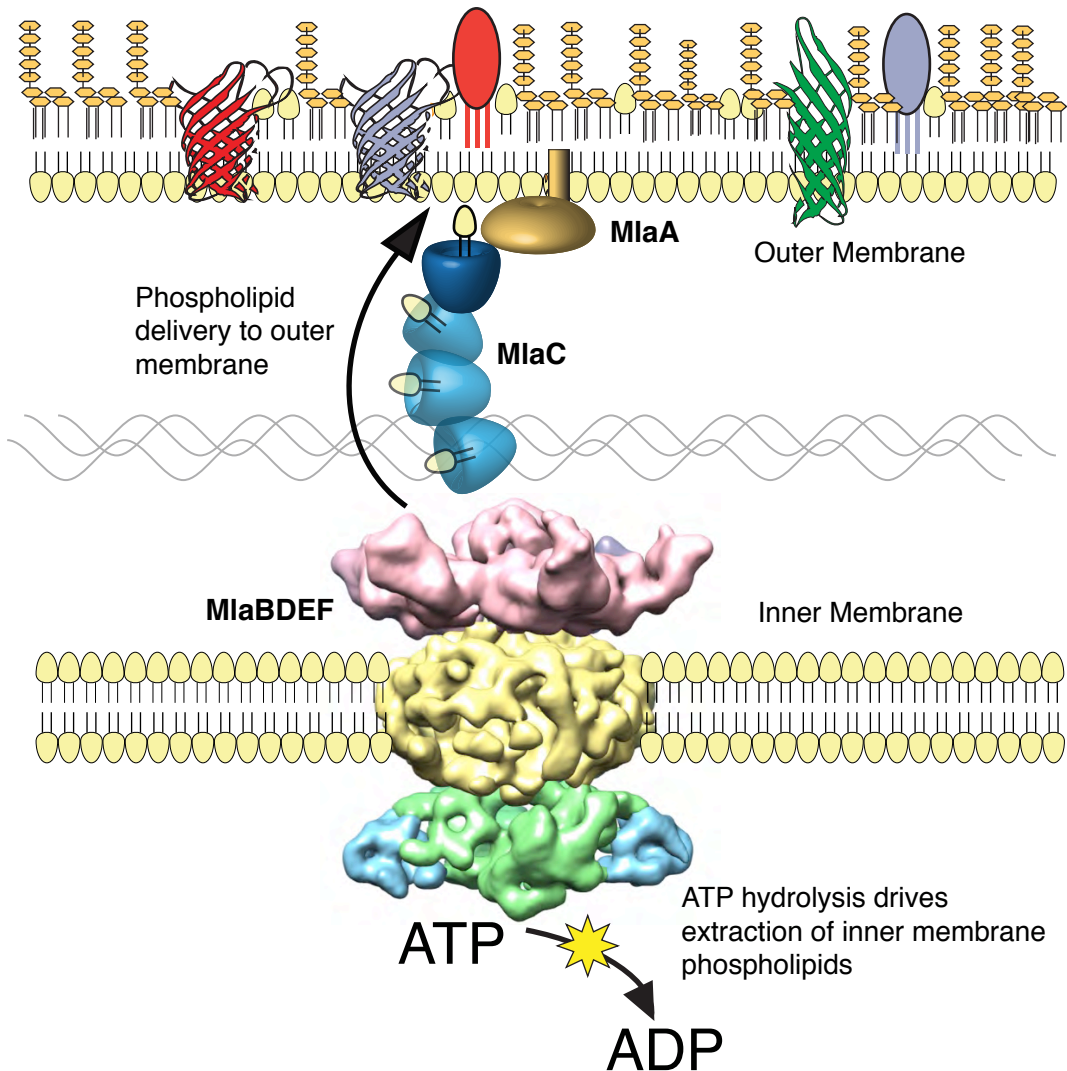

**Fig 6. The multicomponent Mla system transports glycerophospholipids from the inner membrane to the outer membrane of *A. baumannii*.** A schematic of glycerophospholipid transport to the Gram-negative bacterial outer membrane by the Mla system.

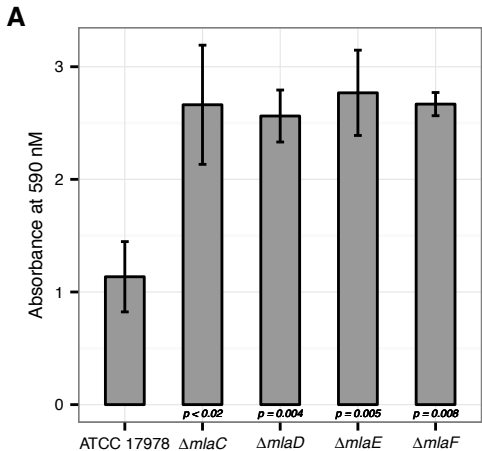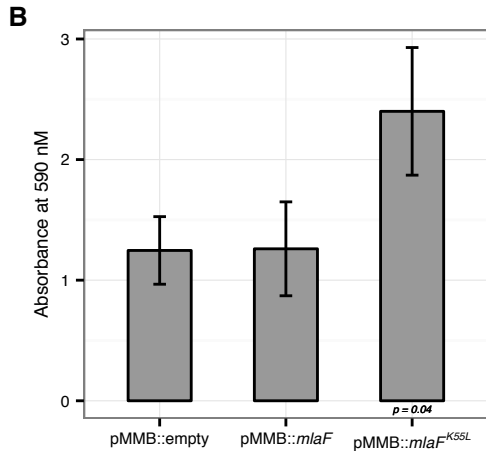

**Fig. S1. Disruption of the Mla system leads to an increase in exopolysaccharide production. (A)** Quantification of crystal violet staining from *mla* deletion mutants. Error bars represent  $\pm$  s.d. for biological replicates ( $n = 3$ ). **(B)** Quantification of crystal violet staining following plasmid expression of MlaF compared to its dominant negative version, MlaF<sup>K55L</sup>. Error bars represent  $\pm$  s.d. for biological replicates ( $n = 3$ ).

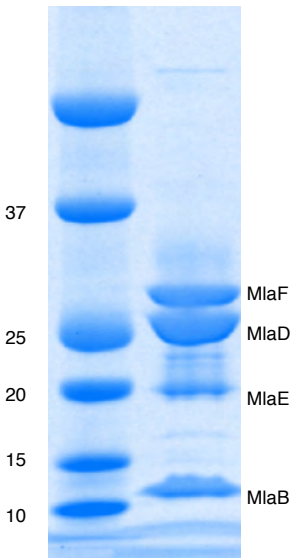

**Fig. S2. Mla components copurify following protein expression.**

SDS-PAGE analysis of proteins copurified with hexahistidine-tagged MlaB (-His6). Band identities were assigned based on MS.

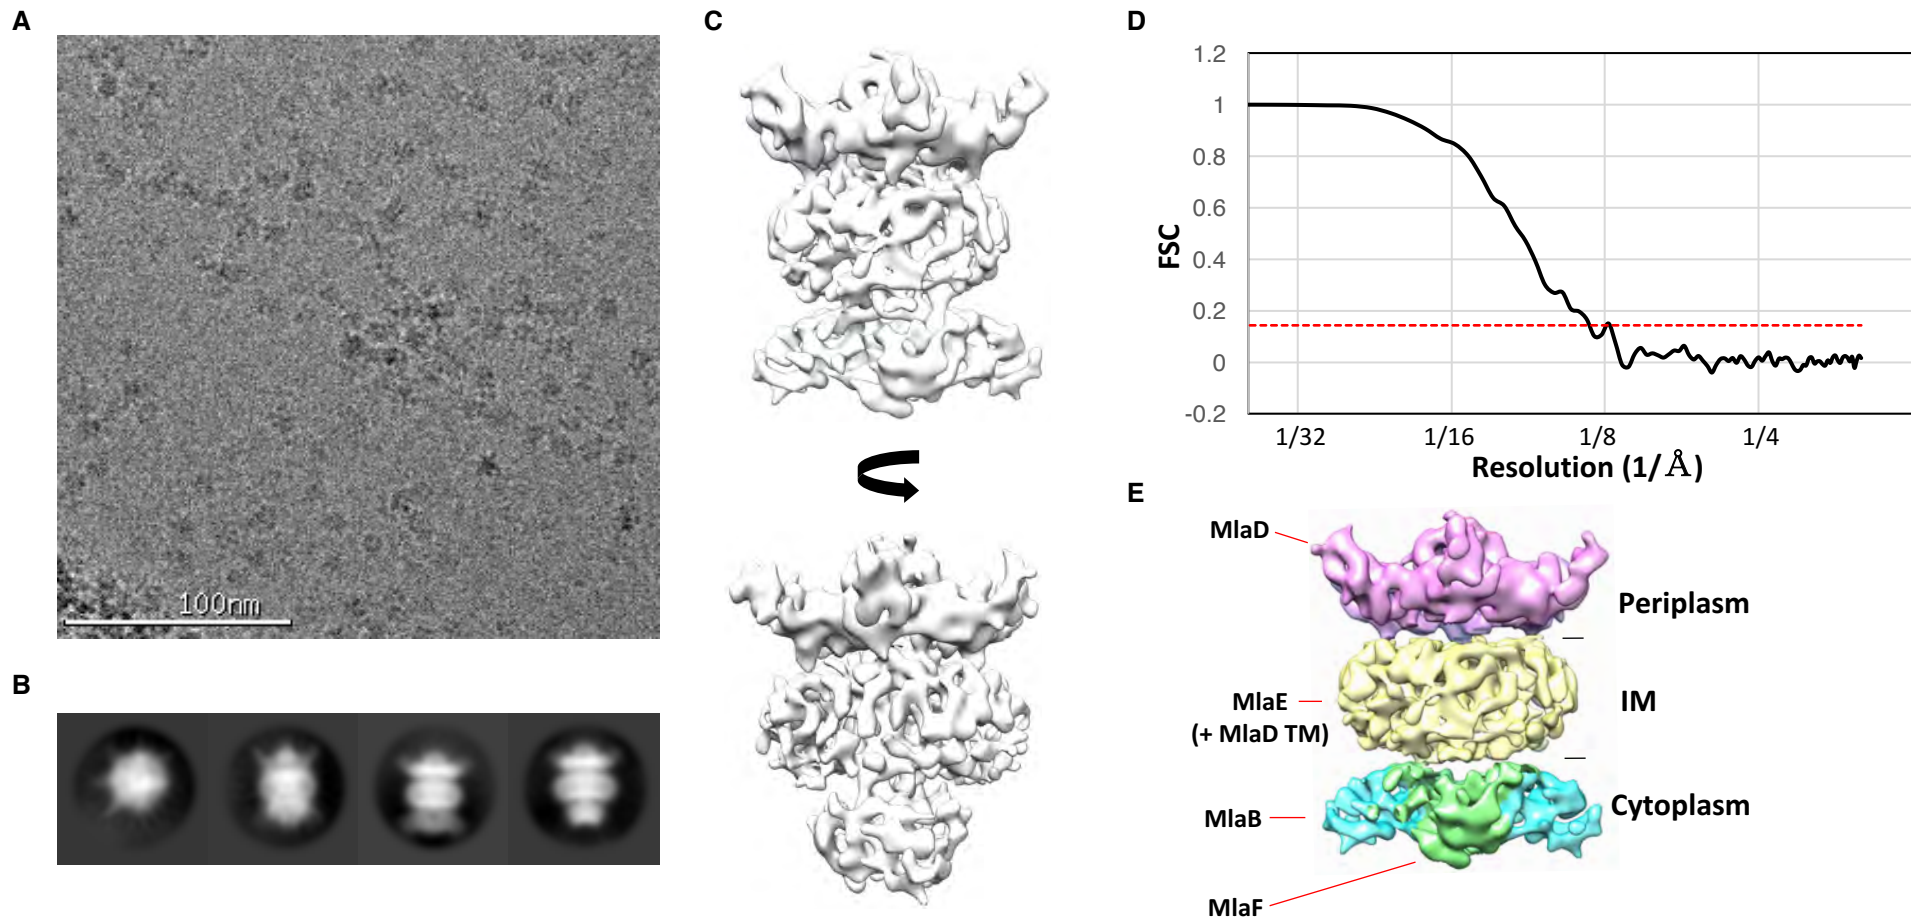

**Fig. S3. Cryo-EM structure of the abMlaBDEF complex.** (A) Representative electron micrograph region of frozen-hydrated MlaBDEF complex. The scale bar is in white at the bottom. (B) Representative reference-free 2D class averages of abMlaBDEF, generated using Relion, illustrating the various views observed. (C) Cryo-EM map of the Mla complex, shown in two orientations corresponding to the two last classes shown in B. (D) The FSC curve for the MlaBDEF structure is shown in black, with the gold-standard resolution definition of 0.143% indicated with a red dotted line. The nominal resolution for this structure is 8.7 Å. (E) The regions of density attributed to the periplasmic domain of MlaD, the TM domains of MlaD and MlaE, and to MlaB and MlaF are in pink, yellow, cyan and green respectively.

**A**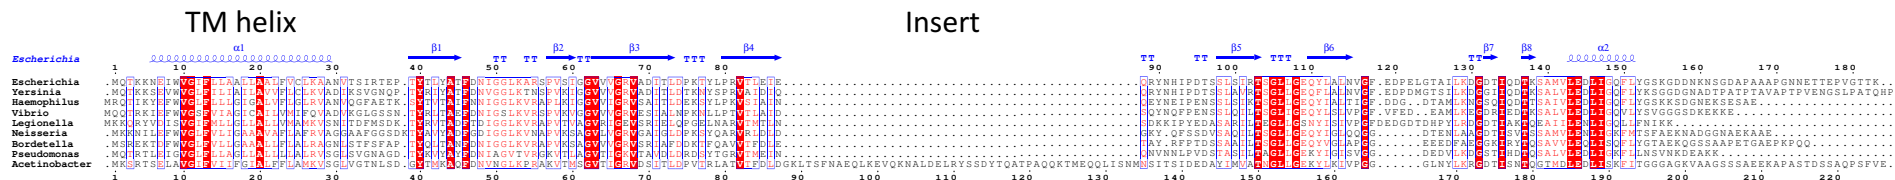**B**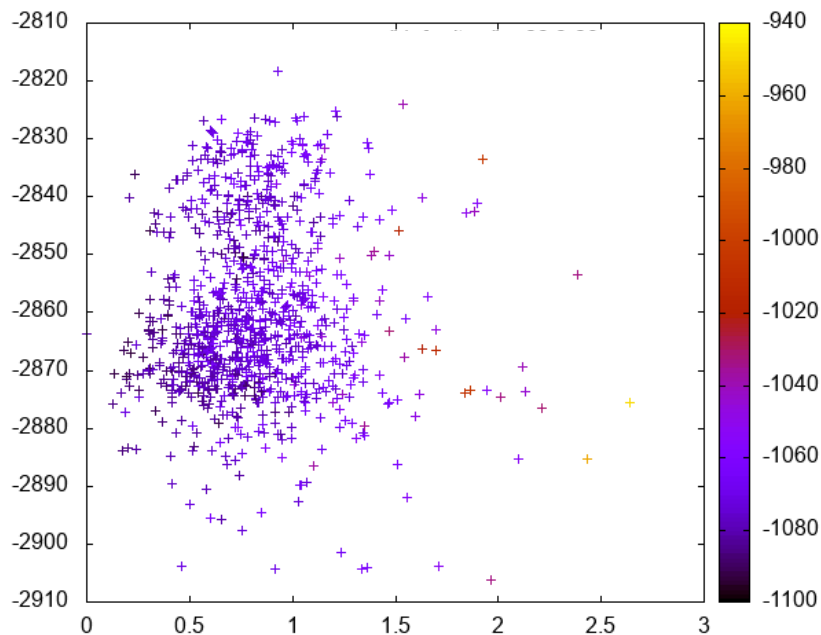**C**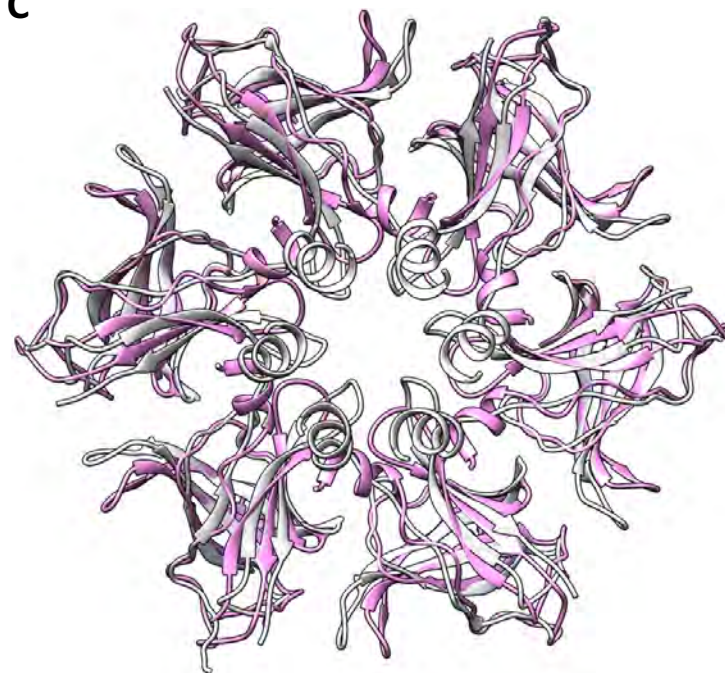

**Fig. S4. Modeling of the abMlaD hexamer.** (A) Multiple alignment of MlaD sequences from various gram-negative human pathogens. The secondary structure for ecMlaD is shown at the top. The position of the abMlaD insert is indicated. (B) Result of the all-atom refinement step for the MlaD hexameric model. The energy of each model is plotted versus the RMSD relative to the initial model, and color-coded for the fit to the EM map density. (C) Cartoon representation of our abMlaD hexameric model (magenta), superimposed to the crystallographic ecMlaD hexamer structure (grey).

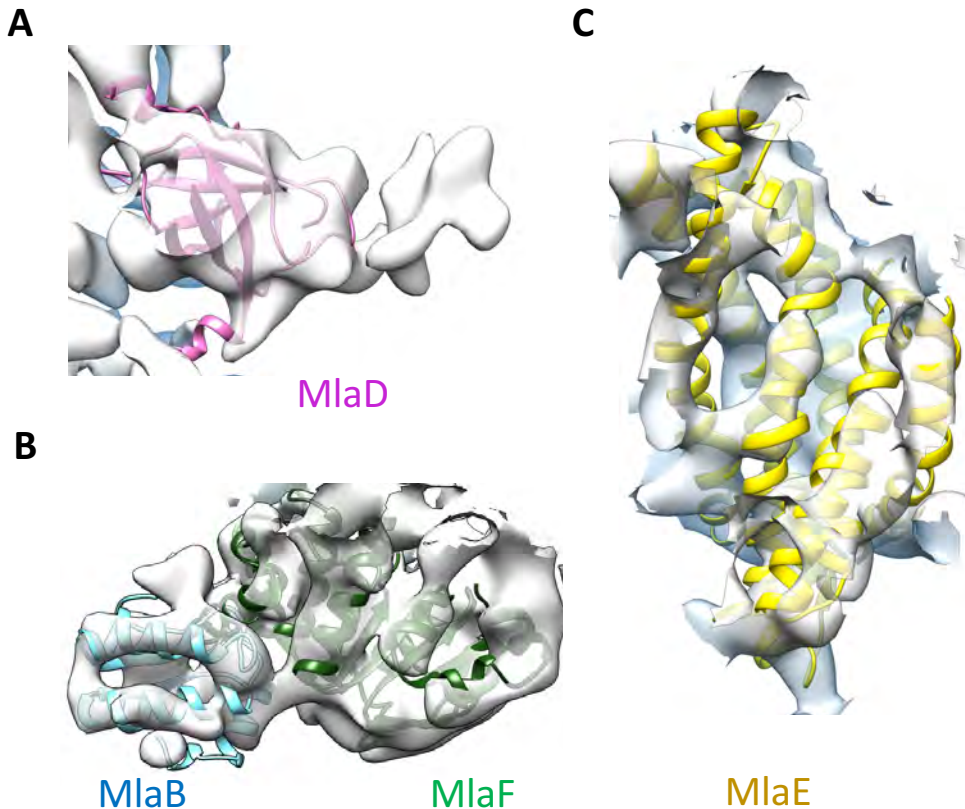

**Fig. S5. Close-up view of the MlaB, MlaD, MlaE and MlaF models in the abMlaBDEF cryo-EM map. (A)** Region of the density corresponding to a MlaD monomer, with the corresponding atomic model in magenta. **(B)** Region of the density corresponding to a MlaF-MlaB hetero-dimer, with the corresponding atomic models in green and cyan respectively, shown from two different angles. Density for helices are well defined for most of the model. **(C)** Region of the density corresponding to a MlaE monomer, with the corresponding atomic model in yellow.



**A**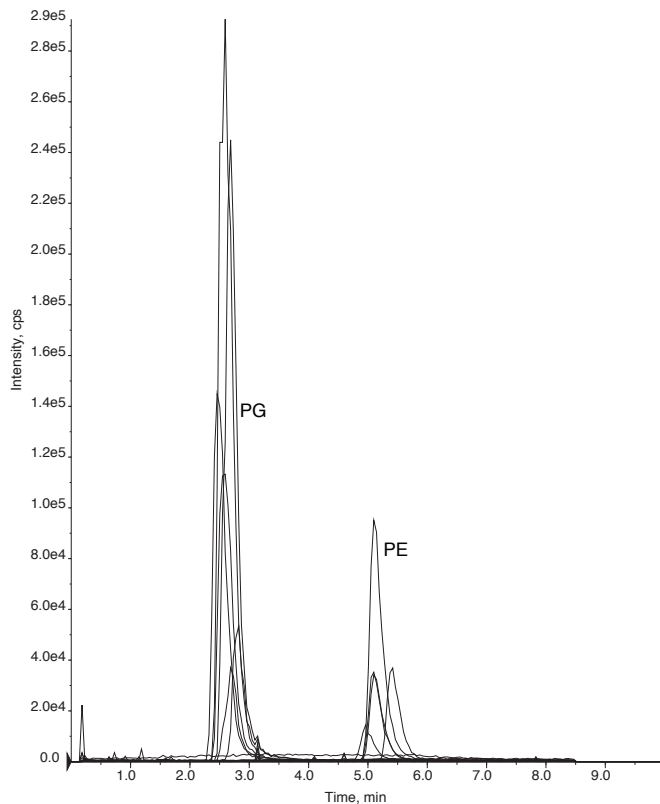**B**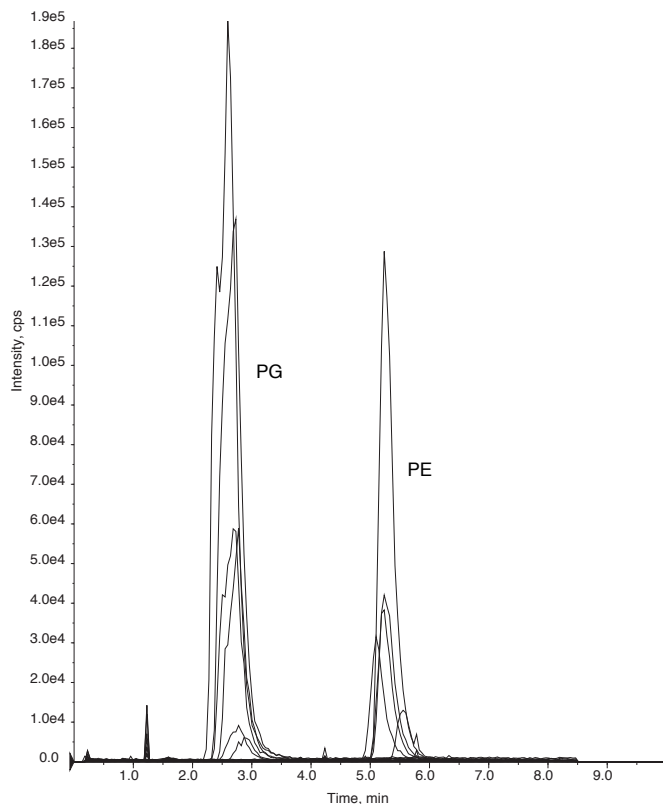

**Fig S6. Purified periplasmic components of the Mla system remain bound to glycerophospholipids.** (A) Chromatogram of LC-MS/MS of glycerophospholipids extracted from purified MlaC. Peaks were identified based on MS and elution time. PG, phosphatidylglycerol. PE, phosphatidylethanolamine. (B) Chromatogram of LC-MS/MS of glycerophospholipids extracted from purified MlaD soluble domain.

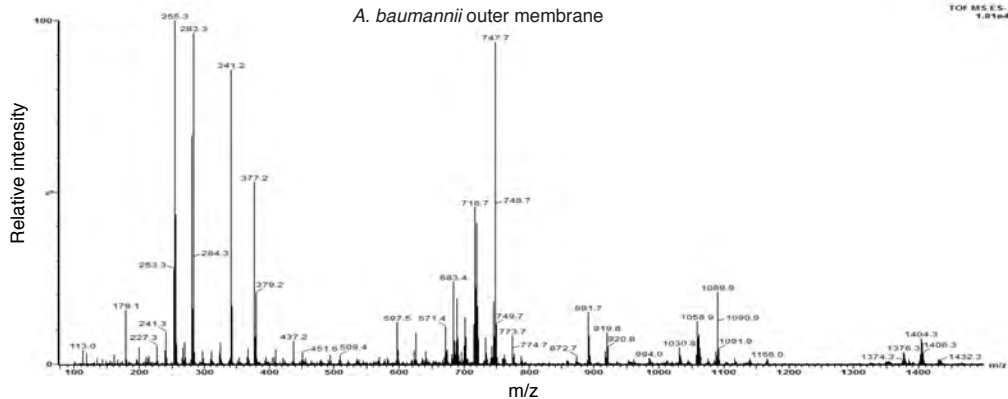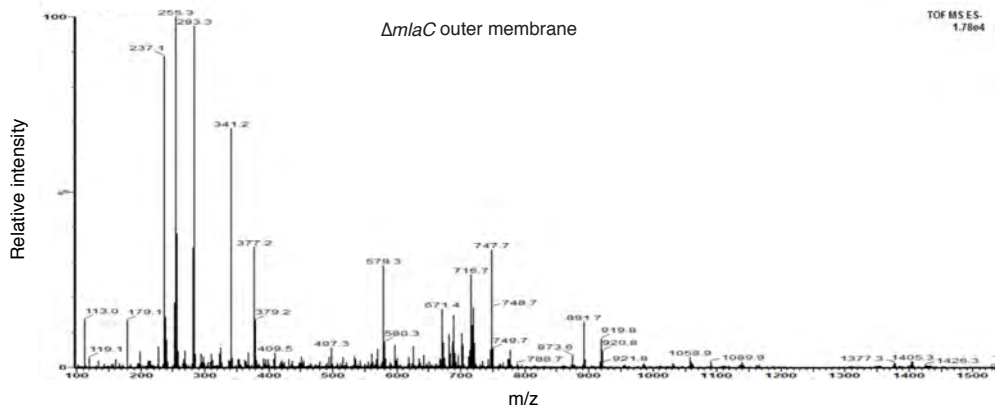

**Fig. S7.** Deletion of *mlaC* results in a reduction in levels of outer membrane glycerophospholipids. Total ion scan of isolated outer membranes of *A. baumannii* and  $\Delta mlaC$ . Typical membrane glycerophospholipids fall within the m/z range of 600-1500.

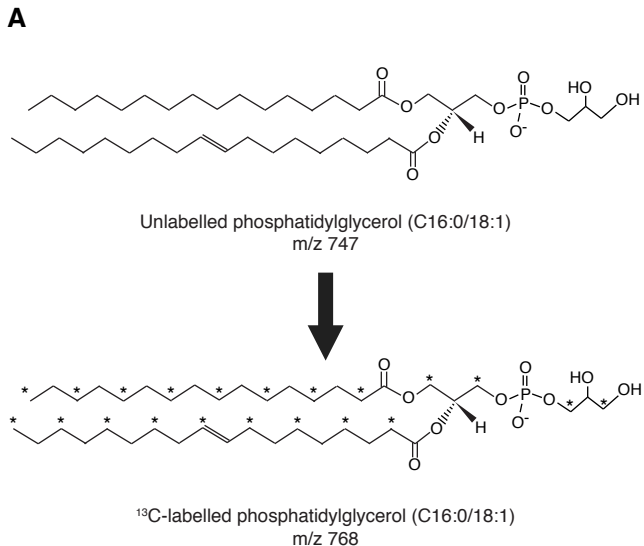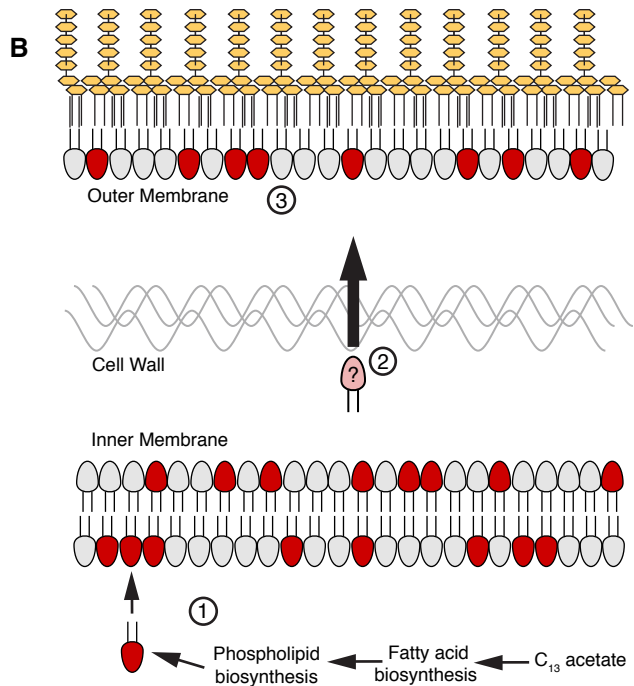

**Fig S8. A stable isotope assay of glycerophospholipid transport from the inner membrane to the outer membrane (A)** Schematic showing an example of the shift in mass-to-charge ratio (m/z) of glycerophospholipids (GPL) following growth in  $2\text{-}^{13}\text{C}$  acetate. **(B)** A schematic illustrating the rationale of the stable isotope assay: (1) Newly synthesized  $^{13}\text{C}$ -labelled GPL, shown here in red, are first inserted into the inner membrane (IM) following synthesis; (2) the likelihood that a given GPL that is trafficked from the IM to the OM will be labeled is proportional to the ratio of labeled to unlabeled GPL in the IM; (3) a comparison of the ratios of labeled to unlabeled GPL in the inner and outer membranes will therefore reflect the efficiency of GPL transport.

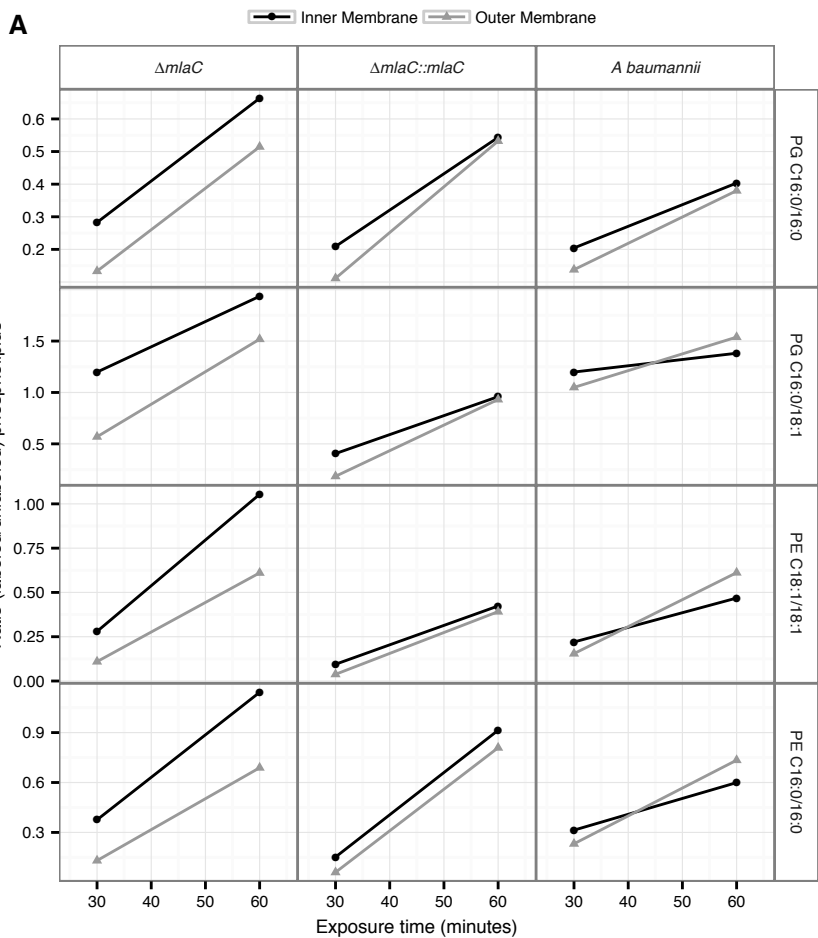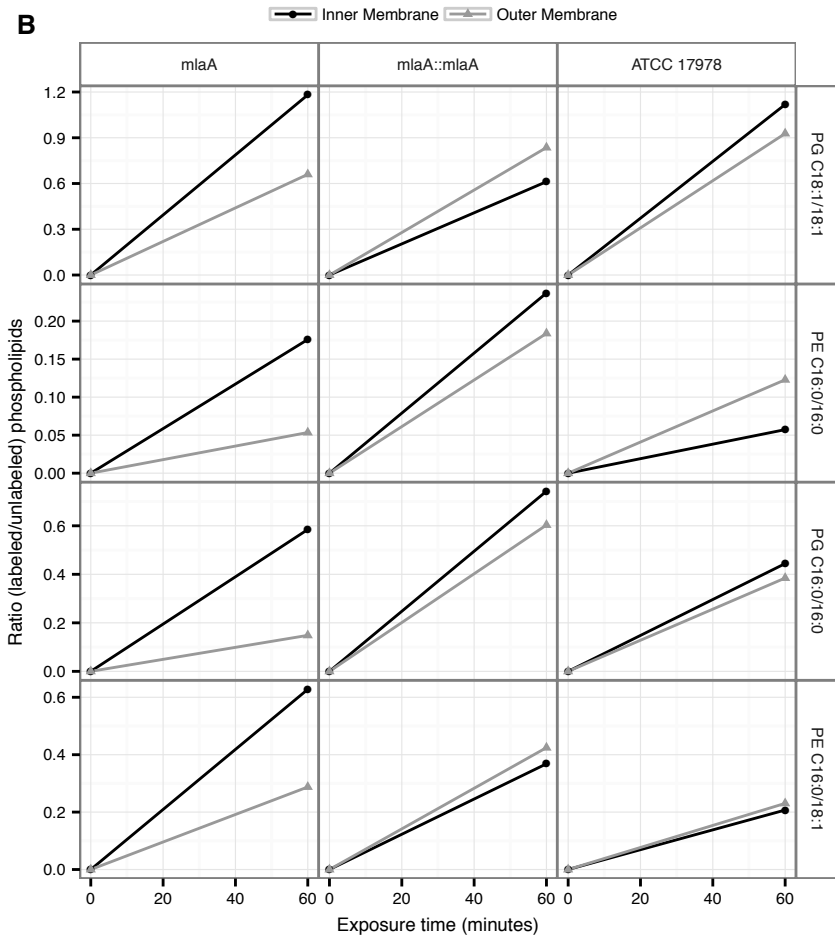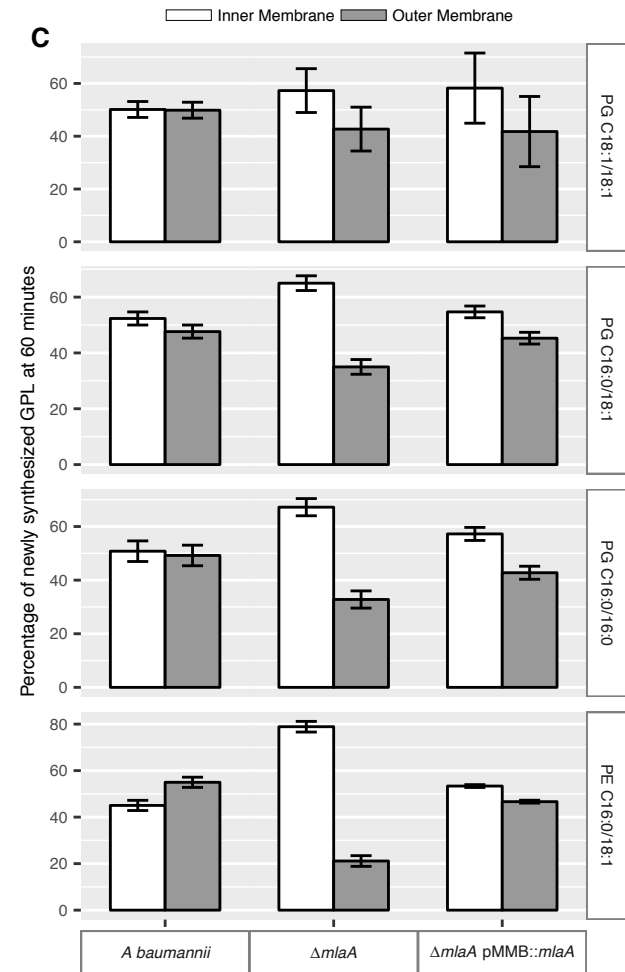

**Fig. S9. Newly synthesized glycerophospholipids accumulate at the inner membrane of *MiaA* mutants.** (A) LC-MS/MS quantification of  $^{13}\text{C}$  labeled/unlabeled glycerophospholipids in isolated membrane fractions over time after growth in  $2\text{-}^{13}\text{C}$  acetate in  $\Delta mIaC$  and complemented strain. Facet labels on the right indicate the specific glycerophospholipid species analyzed and the acyl chain length. PG, phosphatidylglycerol; PE, phosphatidylethanolamine. Shown is representative data from repeated experiments. (B) LC-MS/MS quantification of  $^{13}\text{C}$  labeled/unlabeled glycerophospholipids in isolated membrane fractions over time after growth in  $2\text{-}^{13}\text{C}$  acetate in  $\Delta mIaA$  and complemented strain. Facet labels on the right indicate the specific glycerophospholipid species analyzed and the acyl chain length. PG, phosphatidylglycerol; PE, phosphatidylethanolamine. Shown is representative data from repeated experiments. (C) Relative proportion of newly synthesized GPL in IM and OM after one hour growth in  $2\text{-}^{13}\text{C}$  acetate. Error bars represent  $\pm$  s.d. (n = 2). Statistical analyses performed using a Student's t test. p-Value: \*, p < 0.05; \*\*, p < 0.01.

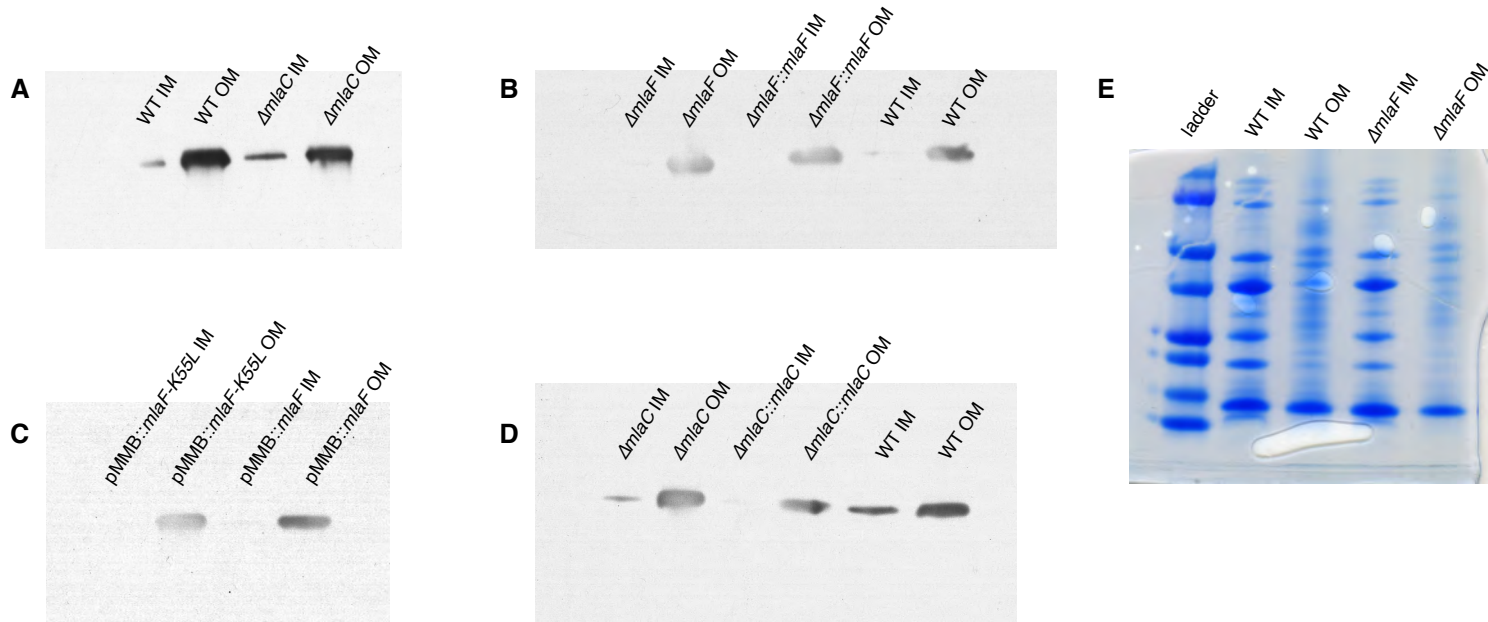

**Fig. S10. Confirmation of inner and outer membrane separation.** Each lane contains 10  $\mu$ g total protein as measured by Bradford protein assay. **(A)**  $\alpha$ -OmpA Western blot of separated membranes analyzed in Fig. 7. **(B)**  $\alpha$ -OmpA Western blot of separated membranes analyzed in Fig. 9A **(C)**  $\alpha$ -OmpA Western blot of separated membranes analyzed in Fig. 9B. **(D)**  $\alpha$ -OmpA Western blot of separated membranes analyzed in Fig. 9C. **(E)** Coomassie stained SDS-protein gel of representative isolated membrane samples alongside BioRad Precision Plus Protein Standard.

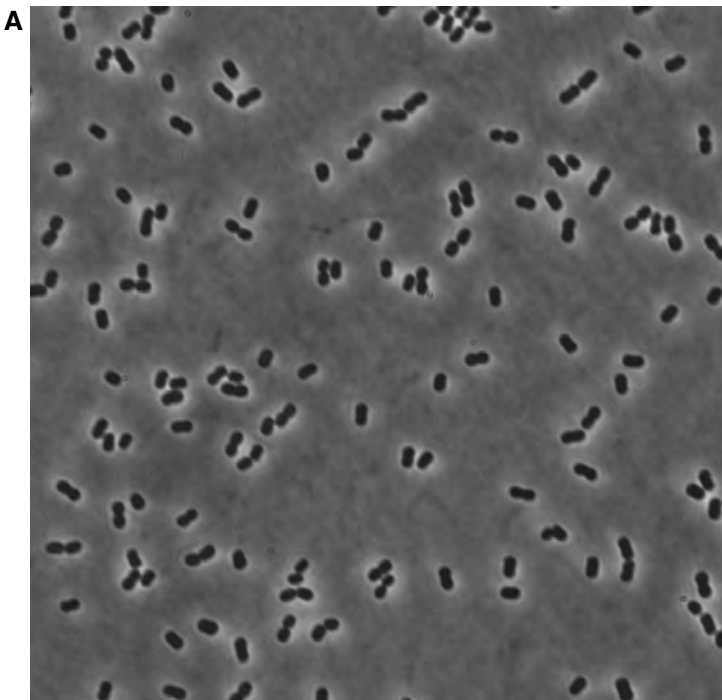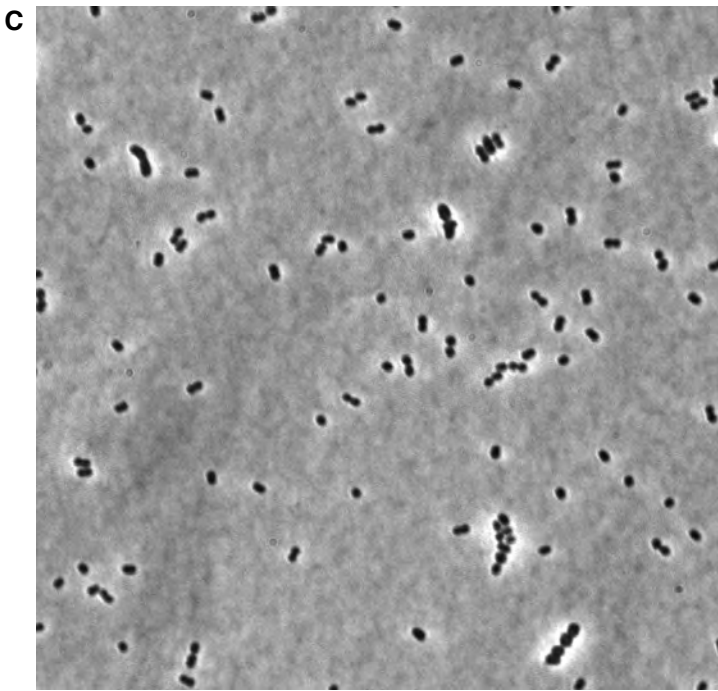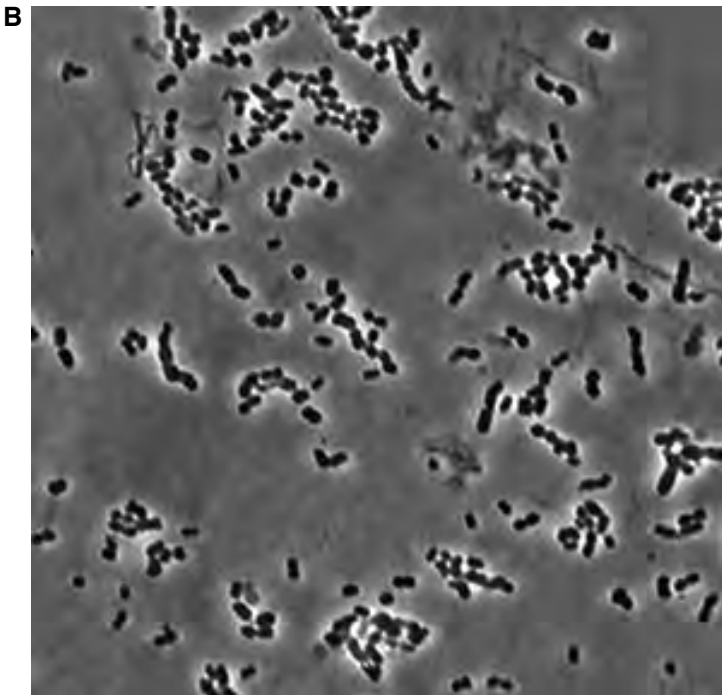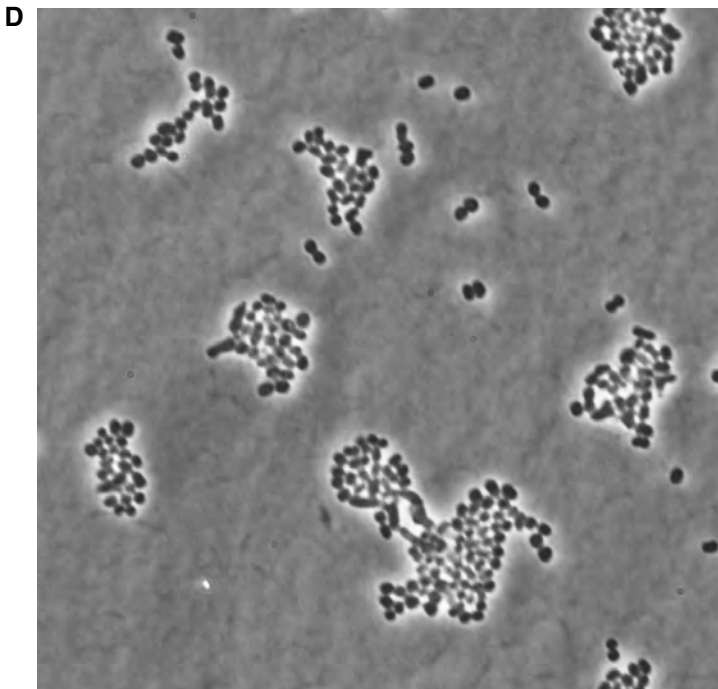

**Fig. S11.** Phase microscopy images of wild type and *mla* mutant *A. baumannii*. Images were collected from cultures grown to mid-log (OD600 0.4-0.6) growth phase from wild type (A), *mlaA* (B), *mlaC* (C), and *mlaF* (D) deletion mutants of *A. baumannii*.



Table S1: Results of transposon mutagenesis screen for genes involved in outer membrane barrier function in ATCC 17978

| BLAST Result                  | Gene  | Description                                                                         | Hit Count <sup>a</sup> | Bioinformatic Predictions |       |                                                                                          | Permeability                                                                       |                          | Antibiotic Susceptibility Disc Assay (mm diameter) |            |            |             |             |             |             |              |             |
|-------------------------------|-------|-------------------------------------------------------------------------------------|------------------------|---------------------------|-------|------------------------------------------------------------------------------------------|------------------------------------------------------------------------------------|--------------------------|----------------------------------------------------|------------|------------|-------------|-------------|-------------|-------------|--------------|-------------|
|                               |       |                                                                                     |                        | SignalP                   | TMHMM | COG Description                                                                          | COG Category                                                                       | EtBr Influx <sup>c</sup> | NPN Influx <sup>b</sup>                            | TMP (5 mg) | RIF (5 mg) | IMP (10 mg) | CB (100 mg) | AMK (30 mg) | GNT (10 mg) | PMB (300 mg) | ERM (15 mg) |
| AIS_0030                      | ssuA1 | aliphatic sulfonates-binding protein                                                | 1                      |                           |       | ABC-type nitrate/sulfonate/bicarbonate transport systems, periplasmic components         | Inorganic ion transport and metabolism                                             |                          |                                                    | 10         | 13         | 35          | 30          | 26          | 25          | 17           | 20          |
| AIS_0049                      | ptk   | protein tyrosine kinase                                                             | 2                      |                           | 2     |                                                                                          | Cell division and chromosome partitioning                                          | Yes                      | Yes                                                | 8          | 10         | 30          | 21          | 22          | 23          | 16           | 20          |
| AIS_0057                      |       | capsular polysaccharide synthesis enzyme                                            | 2                      |                           |       | Acetyltransferase (isoleucine patch superfamily)                                         | General function prediction only                                                   | Yes                      | Yes                                                | 8          | 12         | 29          | 27          | 25          | 24          | 17           | 21          |
| AIS_0066                      |       | hypothetical protein                                                                | 1                      |                           |       | Phosphomannomutase                                                                       | Carbohydrate transport and metabolism                                              | Yes                      | Yes                                                | 8          | 12         | 27          | 26          | 24          | 21          | 15           | 20          |
| AIS_0093                      |       | putative membrane protein                                                           | 1                      |                           | 9     | Predicted membrane protein                                                               | Function unknown                                                                   |                          |                                                    | 8          | 11         | 30          | 30          | 26          | 24          | 17           | 20          |
| AIS_0127                      | DedA  | putative integral membrane protein (DedA)                                           | 4                      | Yes                       | 6     | Putative threonine efflux protein                                                        | Amino acid transport and metabolism                                                | Yes                      | Yes                                                | 10         | 20         | 42          | 28          | 25          | 25          | 21           | 18          |
| AIS_0170                      | OncC  | putative outer membrane copper receptor (OncC)                                      | 1                      |                           |       |                                                                                          |                                                                                    |                          |                                                    | 8          | 14         | 33          | 28          | 21          | 20          | 17.5         | 19          |
| AIS_0230                      |       | phosphoglycerate mutase III cofactor independent                                    | 1                      |                           |       | Phosphoglyceromutase                                                                     | Carbohydrate transport and metabolism                                              |                          |                                                    | 8          | 15         | 38          | 36          | 35          | 30          | 20           | 22          |
| AIS_0255                      | toIC  | type I secretion outer membrane protein                                             | 1                      | Yes                       | 2     | Outer membrane protein                                                                   | Cell envelope biogenesis, outer membrane / Intracellular trafficking and secretion | Yes                      |                                                    | 13         | 12         | 32          | 25          | 23          | 23          | 15           | 18          |
| AIS_0256                      |       | high affinity phosphate uptake transcriptional repressor                            | 8                      |                           |       | Phosphate uptake regulator                                                               | Inorganic ion transport and metabolism                                             |                          |                                                    | 12         | 13         | 32          | 26          | 25          | 23          | 18           | 21          |
| AIS_0335                      |       | transcription termination/antitermination I factor                                  | 1                      |                           |       | Transcription elongation factor                                                          | Transcription                                                                      | Yes                      |                                                    | 8          | 8          | 25          | 8           | 22          | 20          | 16           | 8           |
| AIS_0439                      |       | DNA topoisomerase type I omega protein                                              | 2                      | Yes                       |       | Topoisomerase IA                                                                         | DNA replication, recombination, and repair                                         | Yes                      |                                                    | 8          | 12         | 28.5        | 26          | 25          | 23          | 15.5         | 20          |
| AIS_0477                      |       | ATP-dependent Clp protease ATP-binding subunit                                      | 3                      |                           |       | ATP-dependent protease Clp, ATPase subunit                                               | Posttranslational modification, protein turnover, chaperones                       | Yes                      | Yes                                                | 12         | 15         | 43          | 35          | 34          | 32          | 18           | 29          |
| AIS_0612                      |       | DNA polymerase I                                                                    | 2                      |                           |       | DNA polymerase I-3'-5' exonuclease and polymerase domains                                | DNA replication, recombination, and repair                                         | Yes                      | Yes                                                | 12         | 14         | 33          | 33          | 30          | 27          | 17           | 23          |
| AIS_0623                      |       | DNA mismatch repair enzyme                                                          | 1                      |                           |       | DNA mismatch repair enzyme (predicted ATPase)                                            | DNA replication, recombination, and repair                                         |                          |                                                    | 8          | 11         | 29          | 24          | 25          | 23          | 16           | 21          |
| AIS_0643                      |       | hypothetical protein                                                                | 1                      |                           |       | Ifp pilus assembly protein, pilus retraction ATPase PilT                                 | Cell motility and secretion / Intracellular trafficking and secretion              |                          | Yes                                                | 8          | 12         | 32          | 27.5        | 28          | 27          | 17           | 22          |
| AIS_0836                      | tadD  | putative signal peptide                                                             | 1                      |                           |       |                                                                                          |                                                                                    | Yes                      | Yes                                                | 8          | 13         | 31          | 26          | 25          | 22          | 17.5         | 23          |
| AIS_0976                      |       | hypothetical protein                                                                | 2                      | Yes                       |       | Uncharacterized conserved protein                                                        | Function unknown                                                                   |                          |                                                    | 16         | 18         | 43          | 27          | 27          | 27          | 22           | 20          |
| AIS_0999                      |       | hypothetical protein                                                                | 1                      | Yes                       |       |                                                                                          |                                                                                    | Yes                      | Yes                                                | 8          | 17         | 37          | 27          | 28          | 28          | 17           | 22          |
| AIS_1054                      |       | hypothetical protein                                                                | 1                      |                           |       | Ribonuclease HI                                                                          | DNA replication, recombination, and repair                                         |                          |                                                    | 8          | 13         | 29          | 27          | 26          | 25          | 17.5         | 23          |
| AIS_1190                      |       | aspartate carbamoyltransferase catalytic subunit                                    | 4                      |                           |       | Aspartate carbamoyltransferase, catalytic chain                                          | Nucleotide transport and metabolism                                                | Yes                      |                                                    | 8          | 15         | 33          | 27          | 26          | 23          | 19.5         | 18          |
| AIS_1191                      | pyrX  | Dihydroorotase-like protein                                                         | 5                      |                           |       | Dihydroorotase and related cyclic amidohydrolases                                        | Nucleotide transport and metabolism                                                | Yes                      |                                                    | 8          | 15         | 40          | 34          | 30          | 26          | 22           | 20          |
| AIS_1192                      |       | Dihydroorotase-like protein                                                         | 2                      |                           |       | Dihydroorotase and related cyclic amidohydrolases                                        | Nucleotide transport and metabolism                                                |                          |                                                    | 8          | 15         | 39          | 34          | 30          | 18          | 21           | 23          |
| AIS_1225                      |       | Peptidase S24 S26A                                                                  | 2                      |                           |       | Predicted transcriptional regulator                                                      | Transcription                                                                      | Yes                      | Yes                                                | 8          | 10         | 35          | 26          | 22          | 21          | 18           | 16          |
| AIS_1421                      |       | malonate decarboxylase alpha subunit                                                | 1                      |                           |       | Acyl CoA:acetate/3-ketoacid CoA transferase                                              | Lipid metabolism                                                                   |                          |                                                    | 10         | 15         | 31          | 24          | 22          | 22          | 15           | 19          |
| AIS_1453                      | pgk   | phosphoglycerate kinase                                                             | 1                      |                           |       | 3-phosphoglycerate kinase                                                                | Carbohydrate transport and metabolism                                              |                          |                                                    | 8          | 11         | 33          | 30          | 26          | 22          | 17           | 18          |
| AIS_1542                      | marZ  | putative Mar-like protein                                                           | 1                      |                           |       | Nucleotide-binding protein implicated in inhibition of septum formation                  | Cell division and chromosome partitioning                                          |                          |                                                    | 11         | 18         | 40          | 25          | 24          | 25          | 20           | 23          |
| AIS_1543                      |       | phosphoglycerate kinase                                                             | 4                      |                           |       | 3-phosphoglycerate kinase                                                                | Carbohydrate transport and metabolism                                              |                          |                                                    | 8          | 11         | 33          | 30          | 26          | 22          | 17           | 18          |
| AIS_1575                      |       | orotidine-5-phosphate decarboxylase                                                 | 4                      |                           |       | Orotidine-5'-phosphate decarboxylase                                                     | Nucleotide transport and metabolism                                                |                          |                                                    | 8          | 15         | 39          | 37          | 28          | 26          | 20           | 18          |
| AIS_1699                      |       | Putative RND family drug transporter (outer membrane efflux protein)                | 1                      | Yes                       |       | Outer membrane protein                                                                   | Cell envelope biogenesis, outer membrane / Intracellular trafficking and secretion | Yes                      |                                                    | 11         | 16         | 40          | 26          | 24          | 23          | 20           | 18          |
| AIS_1968                      | skp   | putative outer membrane protein (OmpH)                                              | 1                      | Yes                       | 1     | Outer membrane protein                                                                   | Cell envelope biogenesis, outer membrane                                           |                          |                                                    | 8          | 25         | 36          | 29          | 26          | 26          | 19           | 20          |
| AIS_2093                      |       | Hypothetical protein                                                                | 1                      |                           |       |                                                                                          |                                                                                    | Yes                      |                                                    | 10         | 12         | 32          | 28          | 25          | 22          | 16           | 20          |
| AIS_2113                      |       | delta(2)-isopentenylpyrophosphate tRNA-adenosine transferase                        | 1                      |                           |       | tRNA delta(2)-isopentenylpyrophosphate transferase                                       | Translation, ribosomal structure and biogenesis                                    |                          |                                                    | 8          | 10         | 31          | 23          | 22          | 20          | 17           | 20          |
| AIS_2114                      |       | methyl-directed mismatch repair enzyme                                              | 1                      |                           |       |                                                                                          |                                                                                    |                          |                                                    | 8          | 15         | 34          | 33          | 28          | 28          | 19           | 20          |
| AIS_2213                      | CsuE  | Pilus assembly protein, porin PapC                                                  | 1                      | Yes                       | 2     | Pilus assembly protein, porin PapC                                                       | Cell motility and secretion / Intracellular trafficking and secretion              |                          |                                                    | 8          | 14         | 29          | 25          | 25          | 23          | 17           | 18          |
| AIS_2214                      | CsuD  | Pilus assembly protein, porin PapC                                                  | 1                      | Yes                       |       | Pilus assembly protein, porin PapC                                                       | Cell motility and secretion / Intracellular trafficking and secretion              | Yes                      |                                                    | 8          | 11.5       | 35          | 27          | 25          | 23          | 16           | 22          |
| AIS_2400                      |       | hypothetical protein (AIS_2400 metal-dependent hydrolase domain-containing protein) | 1                      |                           | 2     | Predicted metal-dependent hydrolase                                                      | General function prediction only                                                   |                          |                                                    | 16         | 20         | 40          | 25          | 25          | 25          | 21           | 23          |
| AIS_2448                      |       | putative phosphate transporter                                                      | 2                      | Yes                       |       | ABC-type phosphate transport system, periplasmic component                               | Inorganic ion transport and metabolism                                             |                          |                                                    | 13         | 19         | 42          | 23          | 26          | 26          | 24           | 17          |
| AIS_2501                      |       | glyceraldehyde-3-phosphate dehydrogenase                                            | 2                      |                           |       | Glyceraldehyde-3-phosphate dehydrogenase/erythrose-4-phosphate dehydrogenase             | Carbohydrate transport and metabolism                                              |                          |                                                    | 8          | 14         | 28          | 29          | 28          | 25          | 21           | 20          |
| AIS_2604                      | PerM  | putative permease (PerM family)                                                     | 5                      |                           | 10    | Predicted permease, member of the PerR regulon                                           | General function prediction only                                                   |                          |                                                    | 8          | 10         | 32          | 24          | 23          | 22          | 16           | 20          |
| AIS_2686                      | carA  | carbamoyl-phosphate synthase small chain                                            | 2                      |                           |       | Carbamoyl-phosphate synthase small subunit                                               | Amino acid transport and metabolism / Nucleotide transport and metabolism          |                          |                                                    | 8          | 16         | 39          | 40          | 41          | 38          | 22           | 31          |
| AIS_2687                      | carB  | carbamoyl-phosphate synthase large subunit                                          | 4                      |                           |       | Carbamoyl-phosphate synthase large subunit                                               | Amino acid transport and metabolism / Nucleotide transport and metabolism          |                          |                                                    | 8          | 14.5       | 28          | 28          | 24          | 24          | 19           | 18          |
| AIS_2697                      | cobA  | multifunctional protein                                                             | 3                      |                           |       | Uroporphyrinogen-III methylase                                                           | Coenzyme metabolism                                                                |                          |                                                    | 10         | 20         | 48          | 23          | 23          | 23          | 21           | 12          |
| AIS_2722                      |       | putative membrane protein                                                           | 1                      |                           | 1     | Predicted metalloprotease                                                                | General function prediction only                                                   |                          |                                                    | 8          | 11         | 29          | 23          | 22          | 22          | 16           | 17          |
| AIS_2724                      |       | putative hemagglutinin/hemolysin-related protein                                    | 2                      |                           |       |                                                                                          | Function unknown                                                                   |                          |                                                    | 8          | 13         | 29          | 25          | 24          | 22          | 17.5         | 18          |
| AIS_2768                      | uppP  | bactracin resistance protein                                                        | 5                      |                           | 7     | Undecaprenyl pyrophosphate phosphatase                                                   | Lipid transport and metabolism                                                     |                          |                                                    | 8          | 18         | 40          | 24          | 25          | 25          | 20           | 23          |
| AIS_2845                      |       | hypothetical protein                                                                | 1                      |                           |       | Uncharacterized protein conserved in bacteria                                            | Function unknown                                                                   |                          |                                                    | 8          | 19         | 48          | 29          | 28          | 23          | 22           | 22          |
| AIS_2846                      |       | CysI-like sulfite reductase protein                                                 | 1                      |                           |       |                                                                                          |                                                                                    |                          |                                                    | 8          | 12         | 31          | 26          | 25          | 23          | 18           | 20          |
| AIS_2847                      |       | glucose dehydrogenase                                                               | 1                      | Yes                       | 6     | Glucose dehydrogenase                                                                    | Carbohydrate transport and metabolism                                              |                          |                                                    | 10         | 19         | 46          | 26          | 24          | 25          | 22           | 11          |
| AIS_3102                      | mlaE  | toluene tolerance efflux transporter                                                | 2                      |                           | 5     | ABC-type transport system involved in resistance to organic solvents, permease component | Secondary metabolites biosynthesis, transport, and catabolism                      | Yes                      | Yes                                                | 12         | 19         | 40          | 22          | 25          | 24          | 19           | 20          |
| AIS_3103                      | mlaF  | toluene tolerance efflux transporter                                                | 2                      |                           |       | ABC-type transport system involved in resistance to organic solvents, ATPase component   | Secondary metabolites biosynthesis, transport, and catabolism                      | Yes                      | Yes                                                | 8          | 14         | 32          | 26          | 24          | 22          | 16           | 23          |
| AIS_3211                      |       | amino acid permease                                                                 | 1                      |                           | 12    | Amino acid transporters                                                                  | Amino acid transport and metabolism                                                |                          |                                                    | 8          | 11         | 30          | 28          | 26          | 25          | 16.5         | 21          |
| AIS_3340                      | pyrE  | orotate phosphoribosyltransferase                                                   | 1                      |                           |       | Orotate phosphoribosyltransferase                                                        | Nucleotide transport and metabolism                                                | Yes                      |                                                    | 8          | 8          | 24          | 8           | 22          | 21          | 15           | 8           |
| AIS_3436                      |       | putative alcohol dehydrogenase                                                      | 1                      |                           |       | Zn-dependent alcohol dehydrogenases                                                      | General function prediction only                                                   |                          |                                                    | 8          | 11         | 29          | 23          | 22          | 21          | 15           | 18          |
| AIS_3475                      |       | TonB-dependent receptor protein                                                     | 1                      | Yes                       |       | Outer membrane receptor proteins                                                         | Inorganic ion transport and metabolism                                             | Yes                      |                                                    | 10         | 13         | 37          | 28          | 26          | 27          | 17           | 21          |
| AIS_3478                      |       | hypothetical protein                                                                | 1                      |                           |       | Uncharacterized protein conserved in bacteria                                            | Function unknown                                                                   |                          |                                                    | 8          | 12.5       | 32          | 29          | 25          | 24          | 17           | 21          |
| ASI_3612                      |       | HNH endonuclease                                                                    | 1                      |                           |       |                                                                                          |                                                                                    |                          |                                                    | 12         | 23         | 50          | 30          | 28          | 25          | 22           | 22          |
| pCP000521_007895              |       | hypothetical protein                                                                | 3                      |                           |       |                                                                                          |                                                                                    | Yes                      |                                                    | 8          | 11         | 30          | 26          | 24          | 23          | 16           | 19          |
| <b>ATCC 17978 (wild type)</b> |       |                                                                                     |                        |                           |       |                                                                                          |                                                                                    |                          |                                                    | <b>8</b>   | <b>9.5</b> | <b>27</b>   | <b>25</b>   | <b>21</b>   | <b>21.5</b> | <b>15</b>    | <b>19</b>   |

<sup>a</sup>EtBr Influx: Ethidium bromide test for outer membrane permeability

<sup>b</sup>NPN Influx: 1-N-phenylhaphthylamine test of membrane permeability

<sup>c</sup>Hit Count: number of transposon insertions obtained within open reading frame

TMP: Trimethoprim, RIF: Rifampicin, IMP: Imipenem, CB: Carbenicillin, AMK: Amikacin, GNT: Gentamicin, PMB: Polymyxin B, ERM: Erythromycin
